# Supplementary material
Source: publisher figshare collection journal article supplement (https://asha.figshare.com/articles/dataset/_/23298032)
Supplement: Supplementary file 1 [file 1]

**Supplemental Table S11.** Summary of test-retest results for the Sandwich procedural narrative.

Given that sample length (in both subject groups) and aphasia severity (Aphasia group only) may affect discourse measure reliability, here we stratify ICC, Spearman's rho, and Wilcoxon's signed rank test *p*-value by each factor. Sample length is the average sample length across all discourse tasks (*n* = 12 in each sample length group for NBD group (Med = 133.75 words); *n* = 10 in long sample and *n* = 13 in short sample length group for Aphasia group (Med = 47.5 words)).

| Proxy                       | Group   | Measure    | Long sample length                                           | Short sample length                                          | Mild or Latent Severity ( <i>n</i> = 14)                     | Moderate or Severe Severity ( <i>n</i> = 9)                  | Latent Aphasia ( <i>n</i> = 6)                               | Clinical Aphasia ( <i>n</i> = 17)                            |
|-----------------------------|---------|------------|--------------------------------------------------------------|--------------------------------------------------------------|--------------------------------------------------------------|--------------------------------------------------------------|--------------------------------------------------------------|--------------------------------------------------------------|
|                             |         |            | ICC (95% CI)<br>[Spearman's rho]<br>Wilcoxon <i>p</i> -value |
| Lexical and informativeness | NBD     | %CIU       | -0.05 (-0.62, 0.53)<br>[-0.29], <i>p</i> = .47               | 0.08 (-0.53, 0.62)<br>[0.13], <i>p</i> = .62                 | N/A                                                          | N/A                                                          | N/A                                                          | N/A                                                          |
|                             | Aphasia |            | 0.60 (0.01, 0.88)<br>[0.74], <i>p</i> = .38                  | 0.74 (0.35, 0.91)<br>[0.76], <i>p</i> = .64                  | 0.56 (0.05, 0.83)<br>[0.64], <i>p</i> = .50                  | 0.50 (-0.23, 0.86)<br>[0.55], <i>p</i> = .57                 | -0.25 (-1.18, 0.69)<br>[0.09], <i>p</i> = .84                | 0.70 (0.33, 0.88)<br>[0.74], <i>p</i> = .93                  |
|                             | NBD     | PI Density | -0.08 (-0.69, 0.52)<br>[-0.04], <i>p</i> = .97               | 0.18 (-0.39, 0.66)<br>[0.21], <i>p</i> = .57                 | N/A                                                          | N/A                                                          | N/A                                                          | N/A                                                          |
|                             | Aphasia |            | 0.68 (0.17, 0.91)<br>[0.75], <i>p</i> = .31                  | 0.85 (0.59, 0.95)<br>[0.74], <i>p</i> = .38                  | 0.51 (-0.004, 0.81)<br>[0.35], <i>p</i> = .43                | 0.92 (0.71, 0.98)<br>[0.90], <i>p</i> = .50                  | 0.25 (-0.72, 0.85)<br>[0.03], <i>p</i> = .69                 | 0.86 (0.66, 0.95)<br>[0.81], <i>p</i> = .58                  |
|                             | NBD     | TTR        | 0.28 (-0.37, 0.73)<br>[0.45], <i>p</i> = .27                 | 0.41 (-0.23, 0.79)<br>[0.45], <i>p</i> = .68                 | N/A                                                          | N/A                                                          | N/A                                                          | N/A                                                          |
|                             | Aphasia |            | 0.67 (0.14, 0.91)<br>[0.67], <i>p</i> = .43                  | 0.51 (-0.06, 0.82)<br>[0.54], <i>p</i> = .89                 | 0.63 (0.16, 0.87)<br>[0.75], <i>p</i> = .58                  | 0.79 (0.29, 0.95)<br>[0.63], <i>p</i> > .99                  | 0.79 (0.08, 0.97)<br>[0.94], <i>p</i> = .09                  | 0.66 (0.28, 0.86)<br>[0.70], <i>p</i> = .64                  |
|                             | NBD     | Tokens     | 0.62 (0.12, 0.87)<br>[0.58], <i>p</i> = .26                  | 0.66 (0.05, 0.90)<br>[0.90], <i>p</i> = .02                  | N/A                                                          | N/A                                                          | N/A                                                          | N/A                                                          |
|                             | Aphasia |            | 0.49 (-0.09, 0.84)<br>[0.54], <i>p</i> = .11                 | 0.79 (0.44, 0.93)<br>[0.60], <i>p</i> = .84                  | 0.82 (0.51, 0.94)<br>[0.86], <i>p</i> = .15                  | 0.71 (0.14, 0.93)<br>[0.92], <i>p</i> > .99                  | 0.79 (0.19, 0.97)<br>[0.83], <i>p</i> = .22                  | 0.71 (0.37, 0.89)<br>[0.87], <i>p</i> = .62                  |

| Proxy                | Group   | Measure      | Long sample length                                      | Short sample length                                     | Mild or Latent Severity ( $n = 14$ )                    | Moderate or Severe Severity ( $n = 9$ )                 | Latent Aphasia ( $n = 6$ )                              | Clinical Aphasia ( $n = 17$ )                           |
|----------------------|---------|--------------|---------------------------------------------------------|---------------------------------------------------------|---------------------------------------------------------|---------------------------------------------------------|---------------------------------------------------------|---------------------------------------------------------|
|                      |         |              | ICC (95% CI)<br>[Spearman's rho]<br>Wilcoxon $p$ -value |
| Fluency / efficiency | NBD     | CIUs/min     | 0.35 (-0.23, 0.75)<br>[0.34], $p = .27$                 | 0.46 (-0.16, 0.81)<br>[0.41], $p = .79$                 | N/A                                                     | N/A                                                     | N/A                                                     | N/A                                                     |
|                      | Aphasia |              | 0.64 (0.11, 0.89)<br>[0.65], $p = .19$                  | 0.97 (0.88, 0.99)<br>[0.95], $p = .11$                  | 0.92 (0.77, 0.97)<br>[0.87], $p = .95$                  | 0.75 (0.21, 0.94)<br>[0.87], $p = .91$                  | 0.66 (-0.27, 0.95)<br>[0.71], $p = .84$                 | 0.90 (0.75, 0.96)<br>[0.87], $p = .75$                  |
|                      | NBD     | SpeakingSecs | 0.64 (0.16, 0.88)<br>[0.54], $p = .09$                  | 0.67 (0.22, 0.89)<br>[0.73], $p = .17$                  | N/A                                                     | N/A                                                     | N/A                                                     | N/A                                                     |
|                      | Aphasia |              | 0.49 (-0.08, 0.84)<br>[0.62], $p = .23$                 | 0.82 (0.50, 0.94)<br>[0.85], $p = .53$                  | 0.84 (0.58, 0.95)<br>[0.85], $p = .95$                  | 0.65 (0.07, 0.91)<br>[0.75], $p = .50$                  | 0.69 (-0.03, 0.95)<br>[0.90], $p = .44$                 | 0.73 (0.40, 0.89)<br>[0.82], $p > .99$                  |
|                      | NBD     | WPM          | 0.54 (0.03, 0.84)<br>[0.59], $p = .05$                  | 0.62 (0.14, 0.87)<br>[0.58], $p = .30$                  | N/A                                                     | N/A                                                     | N/A                                                     | N/A                                                     |
|                      | Aphasia |              | 0.87 (0.56, 0.97)<br>[0.88], $p > .99$                  | 0.95 (0.82, 0.99)<br>[0.95], $p = .047$                 | 0.94 (0.71, 0.98)<br>[0.97], $p = .02$                  | 0.93 (0.75, 0.99)<br>[0.98], $p = .57$                  | 0.79 (0.19, 0.97)<br>[0.83], $p = .44$                  | 0.95 (0.87, 0.98)<br>[0.96], $p = .28$                  |
| Syntactic            | NBD     | Noun/verb    | 0.75 (0.32, 0.92)<br>[0.63], $p = .68$                  | 0.36 (-0.25, 0.76)<br>[0.47], $p = .47$                 | N/A                                                     | N/A                                                     | N/A                                                     | N/A                                                     |
|                      | Aphasia |              | 0.67 (0.09, 0.91)<br>[0.72], $p > .99$                  | 0.01 (-0.63, 0.58)<br>[0.15], $p = .68$                 | 0.62 (0.18, 0.86)<br>[0.66], $p = .15$                  | 0.10 (-0.73, 0.73)<br>[0.36], $p = .55$                 | 0.47 (-0.47, 0.91)<br>[0.66], $p = .56$                 | 0.21 (-0.35, 0.63)<br>[0.55], $p = .94$                 |
|                      | NBD     | Open/closed  | -0.13 (-0.65, 0.45)<br>[-0.37], $p = .30$               | 0.42 (-0.13, 0.79)<br>[0.44], $p = .31$                 | N/A                                                     | N/A                                                     | N/A                                                     | N/A                                                     |
|                      | Aphasia |              | 0.44 (-0.15, 0.82)<br>[0.57], $p = .16$                 | 0.74 (0.33, 0.91)<br>[0.80], $p = .34$                  | 0.82 (0.53, 0.94)<br>[0.57], $p = .43$                  | 0.67 (0.11, 0.91)<br>[0.68], $p = .43$                  | 0.59 (-0.11, 0.93)<br>[0.77], $p = .09$                 | 0.77 (0.46, 0.91)<br>[0.76], $p = .46$                  |
|                      | NBD     | MLU          | -0.15 (-0.63, 0.43)<br>[-0.02], $p = .38$               | 0.49 (-0.02, 0.82)<br>[0.47], $p = .05$                 | N/A                                                     | N/A                                                     | N/A                                                     | N/A                                                     |
|                      | Aphasia |              | 0.68 (0.15, 0.91)<br>[0.62], $p = .56$                  | 0.76 (0.40, 0.92)<br>[0.75], $p = .41$                  | 0.74 (0.36, 0.91)<br>[0.61], $p = .88$                  | 0.78 (0.30, 0.95)<br>[0.85], $p > .99$                  | 0.31 (-0.75, 0.87)<br>[0.31], $p = .69$                 | 0.87 (0.67, 0.95)<br>[0.87], $p = .68$                  |

| Proxy | Group   | Measure | Long sample length                                      | Short sample length                                     | Mild or Latent Severity ( $n = 14$ )                    | Moderate or Severe Severity ( $n = 9$ )                 | Latent Aphasia ( $n = 6$ )                              | Clinical Aphasia ( $n = 17$ )                           |
|-------|---------|---------|---------------------------------------------------------|---------------------------------------------------------|---------------------------------------------------------|---------------------------------------------------------|---------------------------------------------------------|---------------------------------------------------------|
|       |         |         | ICC (95% CI)<br>[Spearman's rho]<br>Wilcoxon $p$ -value |
|       | NBD     |         | 0.15 (-0.48, 0.66)<br>[-0.11], $p = .57$                | 0.11 (-0.21, 0.53)<br>[0.0], $p = .02$                  | N/A                                                     | N/A                                                     | N/A                                                     | N/A                                                     |
|       | Aphasia | VerbUtt | 0.25 (-0.44, 0.75)<br>[0.19], $p = .56$                 | 0.62 (0.17, 0.87)<br>[0.76], $p = .17$                  | 0.46 (-0.07, 0.79)<br>[0.46], $p = .22$                 | 0.82 (0.36, 0.96)<br>[0.78], $p = .43$                  | 0.12 (-0.96, 0.82)<br>[0.27], $p > .99$                 | 0.79 (0.52, 0.92)<br>[0.81], $p = .41$                  |

Koo and Li (2016) gives the following suggestion for interpreting intraclass correlation coefficient (ICC), including confidence intervals: below 0.50 = poor; between 0.50 and 0.75 = moderate; between 0.75 and 0.90 = good; and above 0.90 = excellent.
