# Supplementary material
Source: publisher figshare collection journal article supplement (https://asha.figshare.com/articles/dataset/_/23298032)
Supplement: Supplementary file 2 [file 1]

**Supplemental Table S4.** Summary of test-retest results for the Cat Rescue task (describing a single picture).

Koo and Li (2016) gives the following suggestion for interpreting ICC: below 0.50 = poor; between 0.50 and 0.75 = moderate; between 0.75 and 0.90 = good; and above 0.90 = excellent ("exc"). Lin's concordance correlation coefficient (CCC) is given in cases where ICC is poor, to identify if this improves the estimate. If it does improve the estimate, it suggests that test-retest the low ICC is due to lack of spread (i.e., lack of true intra-group variability).

| Primary Proxy               | Measure      | Group   | ICC (CCC)      | 95% ICC CI (95% CCC CI)      | Koo & Li (2016) ICC Quality (CI Quality)   | Spearman's rho ( <i>p</i> -value) | Systematic difference                    | SEM / MDC90   |
|-----------------------------|--------------|---------|----------------|------------------------------|--------------------------------------------|-----------------------------------|------------------------------------------|---------------|
| Lexical and informativeness | %CIU         | NBD     | 0.68           | 0.39, 0.85                   | Moderate (Poor – Good)                     | 0.37 (.07)                        | $V = 178, p = .44$                       | 0.06          |
|                             |              | Aphasia | 0.76           | 0.52, 0.89                   | Good (Moderate – Good)                     | 0.77 ( $p < .0001$ )*^            | $V = 108, p = .38$                       | 0.10 / 0.24   |
|                             | PI Density   | NBD     | 0.41<br>(0.40) | 0.001, 0.69<br>(0.002, 0.68) | Poor (Poor – Moderate)<br>CCC remains poor | 0.30 ( $p = .15$ )                | $V = 145.5, p = .91$                     | 0.03          |
|                             |              | Aphasia | 0.68           | 0.38, 0.85                   | Moderate (Poor – Good)                     | 0.63 (.001)*^                     | $V = 108.5, p = .38$                     | 0.04 / 0.10   |
|                             | TTR          | NBD     | 0.35<br>(0.34) | -0.06, 0.65<br>(-0.06, 0.64) | Poor (Poor – Moderate)<br>CCC remains poor | 0.32 (.12)                        | $V = 180, p = .41$<br>$V = 138, p > .99$ | 0.07          |
|                             |              | Aphasia | 0.64           | 0.32, 0.83                   | Moderate (Poor – Good)                     | 0.63 (.001)*^                     |                                          | 0.08 / 0.19   |
|                             | Tokens       | NBD     | 0.69           | 0.41, 0.85                   | Moderate (Poor – Good)                     | 0.63 (.001)*^                     | $V = 110, p = .26$                       | 41.51         |
|                             |              | Aphasia | 0.79           | 0.54, 0.90                   | Good (Moderate – Exc.)                     | 0.88 ( $p < .0001$ )*^            | $V = 84.5, p = .11$                      | 33.29 / 77.68 |
| Fluency / efficiency        | CIUs / min   | NBD     | 0.82           | 0.63, 0.92                   | Good (Moderate – Exc.)                     | 0.81 ( $p < .0001$ )*^            | $V = 170, p = .58$                       | 14.49         |
|                             |              | Aphasia | 0.90           | 0.79, 0.96                   | Good (Good – Exc.)                         | 0.93 ( $p < .0001$ )*^            | $V = 178, p = .23$                       | 11.76 / 27.44 |
|                             | SpeakingSecs | NBD     | 0.82           | 0.63, 0.92                   | Good (Moderate – Exc.)                     | 0.85 ( $p < .0001$ )*^            | $V = 84, p = .10$                        | 14.49         |
|                             |              | Aphasia | 0.63           | 0.30, 0.83                   | Moderate (Poor – Good)                     | 0.71 ( $p = .0001$ )*^            | $V = 61, p = .04^*$                      | 23.67 / 55.24 |
|                             | WPM          | NBD     | 0.69           | 0.40, 0.85                   | Moderate (Poor – Good)                     | 0.63 (.001)*^                     | $V = 172, p = .55$                       | 17.92         |
|                             |              | Aphasia | 0.91           | 0.79, 0.96                   | Excellent (Good – Exc.)                    | 0.91 ( $p < .0001$ )*^            | $V = 196, p = .08$                       | 12.28 / 28.67 |
| Syntactic                   | MLU          | NBD     | 0.66           | 0.36, 0.84                   | Moderate (Poor – Good)                     | 0.72 ( $p < .0001$ )*^            | $V = 127, p = .53$                       | 1.74          |
|                             |              | Aphasia | 0.85           | 0.68, 0.93                   | Good (Moderate – Exc.)                     | 0.86 ( $p < .0001$ )*^            | $V = 163, p = .46$                       | 1.35 / 3.15   |
|                             | Noun/verb    | NBD     | 0.23<br>(0.23) | -0.20, 0.58<br>(-0.17, 0.56) | Poor (Poor – Moderate)<br>CCC remains poor | 0.37 (.08)                        | $V = 123, p = .46$                       | 0.24          |
|                             |              | Aphasia | 0.68           | 0.37, 0.85                   | Moderate (Poor – Good)                     | 0.66 (.0006)*^                    | $V = 78, p = .07$                        | 0.52 / 1.21   |

| Primary Proxy | Measure     | Group   | ICC (CCC)   | 95% ICC CI (95% CCC CI)   | Koo & Li (2016) ICC Quality (CI Quality)   | Spearman's rho ( <i>p</i> -value) | Systematic difference | SEM / MDC90 |
|---------------|-------------|---------|-------------|---------------------------|--------------------------------------------|-----------------------------------|-----------------------|-------------|
|               | Open/closed | NBD     | 0.20 (0.20) | -0.16, 0.54 (-0.17, 0.51) | Poor (Poor – Moderate)<br>CCC remains poor | 0.21 (.32)                        | $V = 212, p = .08$    | 0.09        |
|               |             | Aphasia | 0.78        | 0.56, 0.90                | Good (Moderate – Exc.)                     | 0.51 ( $p = .02$ )*               | $V = 160, p = .29$    | 0.18 / 0.43 |
|               | VerbUtt     | NBD     | 0.73        | 0.46, 0.87                | Moderate (Poor – Good)                     | 0.57 ( $p = .004$ )*^             | $V = 167, p = .64$    | 0.35        |
|               |             | Aphasia | 0.79        | 0.57, 0.90                | Good (Moderate – Exc.)                     | 0.74 ( $p < .0001$ )*^            | $V = 163, p = .46$    | 0.31 / 0.71 |

CCC = Concordance correlation coefficient; CI = confidence interval; %CIU = Percentage of correct information units; CIUs/min = correct information units per minute; MLU = mean length of utterance (in words); VerbUtt = verbs per utterance; Noun/verb = noun-to-verb ratio; Open/closed = open-to-closed class word ratio; SpeakingSecs = speaking duration in seconds; PI Density = propositional idea density; TTR = type-token ratio; WPM = words per minute; MDC90 = Minimal detectable change at 90% confidence, only calculated for aphasia group; SEM = standard error of measurement.

\* = significant; ^ = significant after Bonferroni correction (11 row-wise within group corrections; new  $p < .004$ ).
