# Supplementary material
Source: publisher figshare collection journal article supplement (https://asha.figshare.com/articles/dataset/_/23298032)
Supplement: Supplementary file 3 [file 1]

**Supplemental Table S13.** Summary of test-retest results for the Refused Umbrella picture sequence.

Given that sample length (in both subject groups) and aphasia severity (Aphasia group only) may affect discourse measure reliability, here we stratify ICC, Spearman's rho, and Wilcoxon's signed rank test *p*-value by each factor. Sample length is the average sample length across all discourse tasks (*n* = 12 in each sample length group for NBD group (Med = 110 words); *n* = 11 in long sample and *n* = 12 in short sample length group for Aphasia group (Med = 80.5 words)).

| Proxy                       | Group   | Measure    | Long sample length                                           | Short sample length                                          | Mild or Latent Severity ( <i>n</i> = 14)                     | Moderate or Severe Severity ( <i>n</i> = 9)                  | Latent Aphasia ( <i>n</i> = 6)                               | Clinical Aphasia ( <i>n</i> = 17)                            |
|-----------------------------|---------|------------|--------------------------------------------------------------|--------------------------------------------------------------|--------------------------------------------------------------|--------------------------------------------------------------|--------------------------------------------------------------|--------------------------------------------------------------|
|                             |         |            | ICC (95% CI)<br>[Spearman's rho]<br>Wilcoxon <i>p</i> -value |
| Lexical and informativeness | NBD     | %CIU       | 0.88 (0.64, 0.96)<br>[0.18], <i>p</i> = .57                  | -0.16 (-0.60, 0.41)<br>[0.03], <i>p</i> = .11                | N/A                                                          | N/A                                                          | N/A                                                          | N/A                                                          |
|                             | Aphasia |            | 0.72 (0.23, 0.92)<br>[0.63], <i>p</i> = .90                  | 0.79 (0.43, 0.93)<br>[0.62], <i>p</i> = .34                  | 0.27 (-0.22, 0.68)<br>[0.32], <i>p</i> = .33                 | 0.91 (0.64, 0.98)<br>[0.88], <i>p</i> = .91                  | 0.61 (-0.13, 0.93)<br>[0.54], <i>p</i> = .31                 | 0.80 (0.53, 0.92)<br>[0.68], <i>p</i> = .22                  |
|                             | NBD     | PI Density | 0.16 (-0.50, 0.67)<br>[0.18], <i>p</i> = .94                 | 0.41 (-0.13, 0.78)<br>[0.43], <i>p</i> = .21                 | N/A                                                          | N/A                                                          | N/A                                                          | N/A                                                          |
|                             | Aphasia |            | 0.30 (-0.34, 0.75)<br>[0.20], <i>p</i> = .47                 | 0.90 (0.70, 0.97)<br>[0.90], <i>p</i> = .57                  | 0.73 (0.36, 0.90)<br>[0.53], <i>p</i> = .15                  | 0.90 (0.61, 0.98)<br>[0.85], <i>p</i> > .99                  | 0.55 (-0.53, 0.93)<br>[0.26], <i>p</i> > .99                 | 0.89 (0.73, 0.96)<br>[0.79], <i>p</i> = .31                  |
|                             | NBD     | TTR        | 0.55 (-0.01, 0.84)<br>[0.55], <i>p</i> = .82                 | 0.51 (-0.10, 0.83)<br>[0.70], <i>p</i> = .97                 | N/A                                                          | N/A                                                          | N/A                                                          | N/A                                                          |
|                             | Aphasia |            | 0.80 (0.44, 0.94)<br>[0.63], <i>p</i> = .29                  | 0.59 (0.08, 0.86)<br>[0.52], <i>p</i> = .06                  | 0.66 (0.22, 0.88)<br>[0.63], <i>p</i> = .93                  | 0.76 (0.28, 0.94)<br>[0.62], <i>p</i> = .20                  | 0.84 (0.15, 0.98)<br>[0.60], <i>p</i> = .09                  | 0.71 (0.35, 0.88)<br>[0.68], <i>p</i> = .08                  |
|                             | NBD     | Tokens     | 0.59 (0.10, 0.86)<br>[0.69], <i>p</i> = .07                  | 0.52 (-0.04, 0.83)<br>[0.68], <i>p</i> = .02                 | N/A                                                          | N/A                                                          | N/A                                                          | N/A                                                          |
|                             | Aphasia |            | 0.45 (-0.08, 0.81)<br>[0.64], <i>p</i> = .78                 | 0.74 (0.30, 0.92)<br>[0.69], <i>p</i> = .78                  | 0.58 (0.12, 0.84)<br>[0.76], <i>p</i> = .02                  | 0.90 (0.65, 0.98)<br>[0.90], <i>p</i> = .41                  | 0.47 (-0.21, 0.90)<br>[0.94], <i>p</i> = .03                 | 0.87 (0.68, 0.95)<br>[0.89], <i>p</i> = .17                  |

| Proxy                | Group   | Measure      | Long sample length                                      | Short sample length                                     | Mild or Latent Severity ( $n = 14$ )                    | Moderate or Severe Severity ( $n = 9$ )                 | Latent Aphasia ( $n = 6$ )                              | Clinical Aphasia ( $n = 17$ )                           |
|----------------------|---------|--------------|---------------------------------------------------------|---------------------------------------------------------|---------------------------------------------------------|---------------------------------------------------------|---------------------------------------------------------|---------------------------------------------------------|
|                      |         |              | ICC (95% CI)<br>[Spearman's rho]<br>Wilcoxon $p$ -value |
| Fluency / efficiency | NBD     | CIUs/min     | 0.79 (0.41, 0.93)<br>[0.56], $p = .85$                  | 0.71 (0.27, 0.91)<br>[0.56], $p = .52$                  | N/A                                                     | N/A                                                     | N/A                                                     | N/A                                                     |
|                      | Aphasia |              | 0.82 (0.43, 0.95)<br>[0.80], $p = .05$                  | 0.83 (0.50, 0.95)<br>[0.88], $p = .73$                  | 0.80 (0.50, 0.93)<br>[0.80], $p = .22$                  | 0.95 (0.82, 0.99)<br>[0.97], $p = .30$                  | 0.70 (-0.24, 0.95)<br>[0.60], $p = .84$                 | 0.88 (0.69, 0.95)<br>[0.85], $p = .08$                  |
|                      | NBD     | SpeakingSecs | 0.62 (0.12, 0.87)<br>[0.72], $p = .09$                  | 0.79 (0.27, 0.94)<br>[0.73], $p = .02$                  | N/A                                                     | N/A                                                     | N/A                                                     | N/A                                                     |
|                      | Aphasia |              | 0.56 (0.03, 0.85)<br>[0.85], $p = .03$                  | 0.56 (-0.01, 0.85)<br>[0.79], $p = .51$                 | 0.52 (0.05, 0.81)<br>[0.63], $p = .15$                  | 0.60 (-0.09, 0.89)<br>[0.87], $p = .58$                 | 0.43 (-0.25, 0.88)<br>[0.77], $p = .06$                 | 0.61 (0.20, 0.84)<br>[0.82], $p = .89$                  |
|                      | NBD     | WPM          | 0.58 (0.02, 0.86)<br>[0.63], $p = .85$                  | 0.67 (0.21, 0.89)<br>[0.59], $p = .42$                  | N/A                                                     | N/A                                                     | N/A                                                     | N/A                                                     |
|                      | Aphasia |              | 0.88 (0.48, 0.97)<br>[0.88], $p = .03$                  | 0.74 (0.32, 0.92)<br>[0.76], $p = .68$                  | 0.88 (0.67, 0.96)<br>[0.78], $p = .30$                  | 0.90 (0.65, 0.98)<br>[0.83], $p = .25$                  | 0.81 (0.13, 0.97)<br>[0.71], $p = .69$                  | 0.86 (0.66, 0.95)<br>[0.78], $p = .13$                  |
| Syntactic            | NBD     | Noun/verb    | 0.30 (-0.34, 0.74)<br>[0.20], $p = .73$                 | 0.24 (-0.28, 0.68)<br>[0.38], $p = .18$                 | N/A                                                     | N/A                                                     | N/A                                                     | N/A                                                     |
|                      | Aphasia |              | -0.09 (-0.69, 0.53)<br>[0.08], $p = .70$                | 0.03 (-0.60, 0.62)<br>[0.04], $p = .70$                 | 0.82 (0.51, 0.94)<br>[0.43], $p = 1$                    | -0.29 (-0.95, 0.57)<br>[-0.50], $p = .94$               | -0.23 (-0.86, 0.64)<br>[-0.09], $p = .44$               | 0.09 (-0.43, 0.56)<br>[0.14], $p = .53$                 |
|                      | NBD     | Open/closed  | 0.61 (0.06, 0.87)<br>[0.43], $p = .85$                  | -0.07 (-0.68, 0.53)<br>[0.06], $p = .79$                | N/A                                                     | N/A                                                     | N/A                                                     | N/A                                                     |
|                      | Aphasia |              | 0.71 (0.26, 0.91)<br>[0.81], $p = .24$                  | 0.19 (-0.38, 0.68)<br>[0.26], $p = .47$                 | 0.82 (0.54, 0.94)<br>[0.79], $p = .81$                  | 0.03 (-0.63, 0.68)<br>[0.18], $p = .74$                 | 0.72 (0.05, 0.95)<br>[0.60], $p = .22$                  | 0.18 (-0.30, 0.60)<br>[0.13], $p = .53$                 |

| Proxy | Group   | Measure | Long sample length                                      | Short sample length                                     | Mild or Latent Severity ( $n = 14$ )                    | Moderate or Severe Severity ( $n = 9$ )                 | Latent Aphasia ( $n = 6$ )                              | Clinical Aphasia ( $n = 17$ )                           |
|-------|---------|---------|---------------------------------------------------------|---------------------------------------------------------|---------------------------------------------------------|---------------------------------------------------------|---------------------------------------------------------|---------------------------------------------------------|
|       |         |         | ICC (95% CI)<br>[Spearman's rho]<br>Wilcoxon $p$ -value |
|       | NBD     |         | 0.39 (-0.10, 0.76)<br>[0.61], $p = .04$                 | 0.28 (-0.29, 0.72)<br>[0.35], $p = .35$                 | N/A                                                     | N/A                                                     | N/A                                                     | N/A                                                     |
|       | Aphasia | MLU     | 0.08 (-0.29, 0.56)<br>[0.17], $p = .04$                 | 0.90 (0.70, 0.97)<br>[0.81], $p = .38$                  | 0.51 (0.03, 0.81)<br>[0.29], $p = .14$                  | 0.88 (0.56, 0.97)<br>[0.69], $p = .82$                  | -0.38 (-0.79, 0.51)<br>[-0.26], $p = .44$               | 0.86 (0.66, 0.95)<br>[0.80], $p = .61$                  |
|       | NBD     |         | 0.35 (-0.15, 0.74)<br>[0.52], $p = .1$                  | -0.03 (-0.66, 0.55)<br>[0.01], $p = .81$                | N/A                                                     | N/A                                                     | N/A                                                     | N/A                                                     |
|       | Aphasia | VerbUtt | 0.07 (-0.28, 0.54)<br>[0.18], $p = .04$                 | 0.85 (0.57, 0.95)<br>[0.84], $p = .29$                  | 0.51 (0.04, 0.81)<br>[0.17], $p = .25$                  | 0.82 (0.37, 0.96)<br>[0.87], $p > .99$                  | -0.05 (-0.34, 0.60)<br>[-0.15], $p = .16$               | 0.81 (0.55, 0.93)<br>[0.82], $p = .88$                  |

Koo and Li (2016) gives the following suggestion for interpreting intraclass correlation coefficient (ICC), including confidence intervals: below 0.50 = poor; between 0.50 and 0.75 = moderate; between 0.75 and 0.90 = good; and above 0.90 = excellent.
