# Supplementary material
Source: publisher figshare collection journal article supplement (https://asha.figshare.com/articles/dataset/_/23298032)
Supplement: Supplementary file 4 [file 1]

**Supplemental Table S3.** Summary of data by task split by group (test and retest are averaged).

"Missing" variables are those that could not be calculated due to one of the test or retest variables being not present (e.g., noun/verb ratio, whereas you cannot divide by 0).

| Proxy                       | Task               | Cat Rescue              |                         | Cinderella              |                          | Sandwich                |                         | Refused Umbrella        |                          | Broken Window           |                          |
|-----------------------------|--------------------|-------------------------|-------------------------|-------------------------|--------------------------|-------------------------|-------------------------|-------------------------|--------------------------|-------------------------|--------------------------|
|                             | Metric /Group      | NBD                     | Aphasia                 | NBD                     | Aphasia                  | NBD                     | Aphasia                 | NBD                     | Aphasia                  | NBD                     | Aphasia                  |
| Lexical and informativeness | <b>% CIU</b>       |                         |                         |                         |                          |                         |                         |                         |                          |                         |                          |
|                             | Mean ( <i>SD</i> ) | 0.827<br>(0.103)        | 0.650<br>(0.200)        | 0.844<br>(0.0444)       | 0.578<br>(0.241)         | 0.805<br>(0.0775)       | 0.599<br>(0.210)        | 0.852<br>(0.115)        | 0.671<br>(0.218)         | 0.739<br>(0.186)        | 0.595<br>(0.213)         |
|                             | Median [Min, Max]  | 0.850<br>[0.449, 0.925] | 0.733<br>[0.285, 0.888] | 0.853<br>[0.723, 0.922] | 0.665<br>[0.0250, 0.843] | 0.823<br>[0.584, 0.903] | 0.664<br>[0.163, 0.938] | 0.876<br>[0.340, 0.925] | 0.777<br>[0.125, 0.882]  | 0.812<br>[0.164, 0.924] | 0.659<br>[0.0967, 0.886] |
|                             | <b>PI density</b>  |                         |                         |                         |                          |                         |                         |                         |                          |                         |                          |
|                             | Mean ( <i>SD</i> ) | 0.473<br>(0.0311)       | 0.417<br>(0.0702)       | 0.498<br>(0.0162)       | 0.441<br>(0.115)         | 0.458<br>(0.0227)       | 0.411<br>(0.0837)       | 0.508<br>(0.0366)       | 0.441<br>(0.128)         | 0.508<br>(0.0300)       | 0.422<br>(0.0969)        |
|                             | Median [Min, Max]  | 0.471<br>[0.403, 0.530] | 0.436<br>[0.237, 0.492] | 0.494<br>[0.470, 0.542] | 0.484<br>[0.140, 0.542]  | 0.457<br>[0.405, 0.504] | 0.435<br>[0.170, 0.545] | 0.509<br>[0.418, 0.581] | 0.486<br>[0.0715, 0.560] | 0.511<br>[0.448, 0.574] | 0.452<br>[0.207, 0.570]  |
|                             | <b>TTR</b>         |                         |                         |                         |                          |                         |                         |                         |                          |                         |                          |
|                             | Mean ( <i>SD</i> ) | 0.485<br>(0.0712)       | 0.525<br>(0.123)        | 0.342<br>(0.0697)       | 0.399<br>(0.133)         | 0.430<br>(0.0799)       | 0.520<br>(0.129)        | 0.515<br>(0.0846)       | 0.530<br>(0.114)         | 0.589<br>(0.0766)       | 0.589<br>(0.133)         |
|                             | Median [Min, Max]  | 0.469<br>[0.388, 0.634] | 0.503<br>[0.335, 0.854] | 0.347<br>[0.239, 0.497] | 0.378<br>[0.230, 0.692]  | 0.423<br>[0.277, 0.579] | 0.515<br>[0.323, 0.812] | 0.514<br>[0.357, 0.671] | 0.523<br>[0.312, 0.841]  | 0.576<br>[0.476, 0.747] | 0.614<br>[0.319, 0.818]  |
|                             | <b>Tokens</b>      |                         |                         |                         |                          |                         |                         |                         |                          |                         |                          |
|                             | Mean ( <i>SD</i> ) | 159<br>(68.7)           | 95.6<br>(68.4)          | 584<br>(280)            | 325<br>(253)             | 144<br>(69.6)           | 69.9<br>(51.8)          | 127<br>(54.7)           | 85.5<br>(61.3)           | 98.1<br>(42.1)          | 73.8<br>(65.0)           |
|                             | Median [Min, Max]  | 156<br>[64.0, 323]      | 80.5<br>[10.0, 313]     | 511<br>[214, 1320]      | 265<br>[15.0, 917]       | 134<br>[47.5, 323]      | 47.5<br>[15.0, 226]     | 110<br>[60.0, 274]      | 80.5<br>[8.00, 270]      | 91.5<br>[45.5, 190]     | 54.5<br>[16.0, 309]      |

| Proxy                | Task                 | Cat Rescue            |                       | Cinderella            |                       | Sandwich             |                       | Refused Umbrella        |                        | Broken Window         |                      |
|----------------------|----------------------|-----------------------|-----------------------|-----------------------|-----------------------|----------------------|-----------------------|-------------------------|------------------------|-----------------------|----------------------|
|                      | Metric /Group        | NBD                   | Aphasia               | NBD                   | Aphasia               | NBD                  | Aphasia               | NBD                     | Aphasia                | NBD                   | Aphasia              |
| Fluency / efficiency | <b>CIUs/Min</b>      |                       |                       |                       |                       |                      |                       |                         |                        |                       |                      |
|                      | Mean ( <i>SD</i> )   | 128<br>(32.6)         | 59.6<br>(37.4)        | 113<br>(19.3)         | 46.0<br>(30.2)        | 132<br>(21.7)        | 58.0<br>(42.2)        | 140<br>(34.9)           | 64.7<br>(39.4)         | 107<br>(36.1)         | 53.2<br>(35.8)       |
|                      | Median [Min, Max]    | 134<br>[66.5, 187]    | 61.9<br>[3.38, 124]   | 112<br>[67.1, 148]    | 39.8<br>[0.536, 115]  | 130<br>[88.5, 174]   | 63.4<br>[1.86, 177]   | 138<br>[57.3, 203]      | 67.9<br>[1.88, 148]    | 113<br>[22.7, 180]    | 52.6<br>[1.30, 133]  |
|                      | <b>Speaking Secs</b> |                       |                       |                       |                       |                      |                       |                         |                        |                       |                      |
|                      | Mean ( <i>SD</i> )   | 66.0<br>(33.2)        | 78.6<br>(35.5)        | 272<br>(130)          | 303<br>(166)          | 55.7<br>(28.3)       | 63.8<br>(41.1)        | 49.0<br>(21.2)          | 69.2<br>(39.1)         | 43.2<br>(20.0)        | 66.0<br>(41.0)       |
|                      | Median [Min, Max]    | 56.3<br>[26.5, 151]   | 70.5<br>[21.0, 163]   | 226<br>[86.0, 653]    | 275<br>[70.5, 639]    | 48.3<br>[20.5, 127]  | 52.0<br>[13.5, 175]   | 41.0<br>[22.5, 99.5]    | 61.0<br>[21.0, 171]    | 38.5<br>[20.5, 91.0]  | 53.0<br>[19.5, 195]  |
|                      | <b>WPM</b>           |                       |                       |                       |                       |                      |                       |                         |                        |                       |                      |
|                      | Mean ( <i>SD</i> )   | 151<br>(29.5)         | 75.8<br>(39.4)        | 131<br>(20.2)         | 61.7<br>(34.0)        | 158<br>(24.8)        | 77.8<br>(46.0)        | 161<br>(32.9)           | 79.3<br>(41.1)         | 141<br>(28.4)         | 72.3<br>(36.2)       |
|                      | Median [Min, Max]    | 153<br>[79.0, 214]    | 76.9<br>[11.6, 148]   | 133<br>[95.2, 160]    | 62.2<br>[8.81, 145]   | 159<br>[103, 200]    | 75.8<br>[12.7, 213]   | 159<br>[64.7, 220]      | 84.3<br>[12.3, 169]    | 140<br>[71.8, 217]    | 72.1<br>[12.2, 143]  |
| Syntactic            | <b>MLU</b>           |                       |                       |                       |                       |                      |                       |                         |                        |                       |                      |
|                      | Mean ( <i>SD</i> )   | 11.4<br>(2.75)        | 7.89<br>(3.39)        | 10.9<br>(1.74)        | 8.06<br>(3.47)        | 10.7<br>(2.31)       | 7.21<br>(3.16)        | 8.49<br>(1.45)          | 6.66<br>(2.47)         | 11.4<br>(1.93)        | 7.67<br>(3.26)       |
|                      | Median [Min, Max]    | 10.3<br>[8.10, 18.8]  | 8.67<br>[2.00, 16.1]  | 10.6<br>[7.56, 14.4]  | 9.28<br>[1.25, 13.4]  | 11.0<br>[4.54, 15.0] | 7.33<br>[1.70, 13.5]  | 8.42<br>[6.00, 11.2]    | 7.60<br>[2.27, 9.89]   | 11.4<br>[8.00, 16.3]  | 8.12<br>[2.27, 14.8] |
|                      | <b>Noun/verb</b>     |                       |                       |                       |                       |                      |                       |                         |                        |                       |                      |
|                      | Mean ( <i>SD</i> )   | 1.07<br>(0.220)       | 1.33<br>(0.839)       | 1.07<br>(0.163)       | 1.16<br>(0.693)       | 1.73<br>(0.425)      | 2.35<br>(1.69)        | 0.670<br>(0.121)        | 0.820<br>(0.513)       | 1.18<br>(0.271)       | 1.33<br>(1.09)       |
|                      | Median [Min, Max]    | 1.03<br>[0.732, 1.52] | 1.14<br>[0.327, 4.25] | 1.05<br>[0.792, 1.41] | 1.05<br>[0.357, 3.02] | 1.62<br>[1.01, 2.53] | 1.84<br>[0.750, 6.40] | 0.658<br>[0.443, 0.914] | 0.694<br>[0.228, 2.30] | 1.10<br>[0.804, 1.79] | 1.07<br>[0, 4.88]    |

| Proxy | Task                    | Cat Rescue                |                           | Cinderella                |                           | Sandwich                  |                           | Refused Umbrella          |                           | Broken Window            |                           |
|-------|-------------------------|---------------------------|---------------------------|---------------------------|---------------------------|---------------------------|---------------------------|---------------------------|---------------------------|--------------------------|---------------------------|
|       | Metric /Group           | NBD                       | Aphasia                   | NBD                       | Aphasia                   | NBD                       | Aphasia                   | NBD                       | Aphasia                   | NBD                      | Aphasia                   |
|       | Missing                 | 0 (0%)                    | 0 (0%)                    | 0 (0%)                    | 1 (4.3%)                  | 0 (0%)                    | 1 (4.3%)                  | 0 (0%)                    | 2 (8.7%)                  | 0 (0%)                   | 1 (4.3%)                  |
|       | <b>Open/<br/>closed</b> |                           |                           |                           |                           |                           |                           |                           |                           |                          |                           |
|       | Mean ( <i>SD</i> )      | 0.981<br>(0.0808)         | 1.02<br>(0.380)           | 0.919<br>(0.0457)         | 0.940<br>(0.255)          | 0.925<br>(0.120)          | 1.10<br>(0.590)           | 1.01<br>(0.170)           | 0.945<br>(0.372)          | 1.06<br>(0.176)          | 0.972<br>(0.293)          |
|       | Median [Min,<br>Max]    | 0.971<br>[0.801,<br>1.15] | 0.885<br>[0.590,<br>2.08] | 0.917<br>[0.855,<br>1.03] | 0.862<br>[0.717,<br>1.75] | 0.908<br>[0.747,<br>1.26] | 0.919<br>[0.566,<br>3.15] | 0.973<br>[0.812,<br>1.58] | 0.827<br>[0.500,<br>2.21] | 1.03<br>[0.870,<br>1.66] | 0.920<br>[0.565,<br>1.98] |
|       | Missing                 | 0 (0%)                    | 1 (4.3%)                  | 0 (0%)                    | 1 (4.3%)                  | 0 (0%)                    | 0 (0%)                    | 0 (0%)                    | 1 (4.3%)                  | 0 (0%)                   | 0 (0%)                    |
|       | <b>WPM</b>              |                           |                           |                           |                           |                           |                           |                           |                           |                          |                           |
|       | Mean ( <i>SD</i> )      | 151<br>(29.5)             | 75.8<br>(39.4)            | 131<br>(20.2)             | 61.7<br>(34.0)            | 158<br>(24.8)             | 77.8<br>(46.0)            | 161<br>(32.9)             | 79.3<br>(41.1)            | 141<br>(28.4)            | 72.3<br>(36.2)            |
|       | Median [Min,<br>Max]    | 153<br>[79.0,<br>214]     | 76.9<br>[11.6,<br>148]    | 133<br>[95.2,<br>160]     | 62.2<br>[8.81,<br>145]    | 159<br>[103,<br>200]      | 75.8<br>[12.7,<br>213]    | 159<br>[64.7,<br>220]     | 84.3<br>[12.3,<br>169]    | 140<br>[71.8,<br>217]    | 72.1<br>[12.2,<br>143]    |

NBD = Without brain damage group; WPM = words per minute; MLU = mean length of utterance in words; Speaking Secs = speaking seconds; CIUs/Min = correct information units per minute; % CIU = proportion of correct information units; Noun / verb = noun/verb ratio; Open/closed = Open/closed class word ratio.
