# Supplementary material
Source: publisher figshare collection journal article supplement (https://asha.figshare.com/articles/dataset/_/23298032)
Supplement: Supplementary file 5 [file 1]

**Supplemental Table S9.** Summary of test-retest results for the Cat Rescue picture description.

Given that sample length (in both subject groups) and aphasia severity (Aphasia group only) may affect discourse measure reliability, here we stratify ICC, Spearman's rho, and Wilcoxon's signed rank test *p*-value by each factor. Sample length is the average sample length across all discourse tasks (*n* = 12 in each sample length group for NBD group (Med = 155.5 words); *n* = 12 in long sample and *n* = 11 in short sample length group for Aphasia group (Med = 80.5 words)).

| Proxy                       | Group   | Measure    | Long sample length                                            | Short sample length                                           | Mild or Latent Severity ( <i>n</i> = 14)                      | Moderate or Severe Severity ( <i>n</i> = 9)                   | Latent Aphasia ( <i>n</i> = 6)                                | Clinical Aphasia ( <i>n</i> = 17)                             |
|-----------------------------|---------|------------|---------------------------------------------------------------|---------------------------------------------------------------|---------------------------------------------------------------|---------------------------------------------------------------|---------------------------------------------------------------|---------------------------------------------------------------|
|                             |         |            | ICC (95% CI)<br>[Spearman's rho],<br>Wilcoxon <i>p</i> -value |
| Lexical and informativeness | NBD     | %CIU       | 0.67 (0.17, 0.89)<br>[0.48], <i>p</i> > .99                   | 0.13 (-0.34, 0.61)<br>[0.45], <i>p</i> = .15                  | N/A                                                           | N/A                                                           | N/A                                                           | N/A                                                           |
|                             | Aphasia |            | 0.92 (0.74, 0.98)<br>[0.76], <i>p</i> = .90                   | 0.67 (0.23, 0.89)<br>[0.69], <i>p</i> = .18                   | 0.86 (0.62, 0.95)<br>[0.70], <i>p</i> = .39                   | 0.47 (-0.11, 0.84)<br>[0.37], <i>p</i> = .04                  | 0.53 (-0.43, 0.92)<br>[0.49], <i>p</i> = .56                  | 0.73 (0.41, 0.89)<br>[0.74], <i>p</i> = .19                   |
|                             | NBD     | PI Density | 0.27 (-0.39, 0.73)<br>[0.13], <i>p</i> = .97                  | 0.41 (-0.22, 0.79)<br>[0.44], <i>p</i> = .97                  | N/A                                                           | N/A                                                           | N/A                                                           | N/A                                                           |
|                             | Aphasia |            | 0.76 (0.29, 0.93)<br>[0.78], <i>p</i> = .07                   | 0.93 (0.78, 0.98)<br>[0.86], <i>p</i> = .30                   | 0.58 (0.13, 0.84)<br>[0.56], <i>p</i> = .12                   | 0.69 (0.11, 0.92)<br>[0.62], <i>p</i> = .82                   | 0.08 (-1.00, 0.81)<br>[0.14], <i>p</i> = .84                  | 0.67 (0.28, 0.87)<br>[0.69], <i>p</i> = .43                   |
|                             | NBD     | TTR        | -0.42 (-0.86, 0.22)<br>[-0.53], <i>p</i> = .62                | 0.29 (-0.34, 0.73)<br>[0.30], <i>p</i> = .47                  | N/A                                                           | N/A                                                           | N/A                                                           | N/A                                                           |
|                             | Aphasia |            | 0.72 (0.16, 0.92)<br>[0.66], <i>p</i> = .04                   | 0.88 (0.62, 0.97)<br>[0.88], <i>p</i> = .13                   | 0.61 (0.17, 0.85)<br>[0.54], <i>p</i> = .30                   | 0.65 (0.09, 0.91)<br>[0.77], <i>p</i> = .30                   | 0.22 (-0.23, 0.79)<br>[0.14], <i>p</i> = .03                  | 0.65 (0.28, 0.86)<br>[0.65], <i>p</i> = .31                   |
|                             | NBD     | Tokens     | 0.44 (-0.18, 0.80)<br>[0.01], <i>p</i> = .79                  | 0.45 (-0.08, 0.80)<br>[0.53], <i>p</i> = .17                  | N/A                                                           | N/A                                                           | N/A                                                           | N/A                                                           |
|                             | Aphasia |            | 0.57 (-0.06, 0.87)<br>[0.75], <i>p</i> = .002                 | 0.93 (0.77, 0.98)<br>[0.92], <i>p</i> = .27                   | 0.76 (0.32, 0.92)<br>[0.76], <i>p</i> = .02                   | 0.84 (0.42, 0.96)<br>[0.80], <i>p</i> = .41                   | 0.69 (-0.06, 0.95)<br>[0.43], <i>p</i> = .03                  | 0.83 (0.59, 0.93)<br>[0.89], <i>p</i> = .81                   |

| Proxy                | Group   | Measure      | Long sample length                                       | Short sample length                                      | Mild or Latent Severity ( $n = 14$ )                     | Moderate or Severe Severity ( $n = 9$ )                  | Latent Aphasia ( $n = 6$ )                               | Clinical Aphasia ( $n = 17$ )                            |
|----------------------|---------|--------------|----------------------------------------------------------|----------------------------------------------------------|----------------------------------------------------------|----------------------------------------------------------|----------------------------------------------------------|----------------------------------------------------------|
|                      |         |              | ICC (95% CI)<br>[Spearman's rho],<br>Wilcoxon $p$ -value |
| Fluency / efficiency | NBD     | CIUs/min     | 0.85 (0.55, 0.95)<br>[0.85], $p = .85$                   | 0.78 (0.41, 0.93)<br>[0.67], $p = .34$                   | N/A                                                      | N/A                                                      | N/A                                                      | N/A                                                      |
|                      | Aphasia |              | 0.90 (0.66, 0.97)<br>[0.87], $p = .83$                   | 0.96 (0.88, 0.99)<br>[0.92], $p = .20$                   | 0.80 (0.51, 0.93)<br>[0.81], $p = .19$                   | 0.96 (0.85, 0.99)<br>[0.90], $p = .91$                   | 0.73 (0.02, 0.96)<br>[0.94], $p = .09$                   | 0.89 (0.72, 0.96)<br>[0.92], $p = .85$                   |
|                      | NBD     | SpeakingSecs | 0.75 (0.35, 0.92)<br>[0.76], $p = .59$                   | 0.67 (0.16, 0.89)<br>[0.53], $p = .04$                   | N/A                                                      | N/A                                                      | N/A                                                      | N/A                                                      |
|                      | Aphasia |              | 0.57 (0.02, 0.86)<br>[0.78], $p = .02$                   | 0.91 (0.72, 0.97)<br>[0.84], $p = .47$                   | 0.55 (0.07, 0.83)<br>[0.63], $p = .03$                   | 0.84 (0.44, 0.96)<br>[0.85], $p = .72$                   | 0.48 (-0.17, 0.89)<br>[0.32], $p = .04$                  | 0.79 (0.53, 0.92)<br>[0.82], $p = .29$                   |
|                      | NBD     | WPM          | 0.64 (0.11, 0.88)<br>[0.70], $p = .85$                   | 0.72 (0.30, 0.91)<br>[0.51], $p = .27$                   | N/A                                                      | N/A                                                      | N/A                                                      | N/A                                                      |
|                      | Aphasia |              | 0.92 (0.73, 0.98)<br>[0.86], $p = .37$                   | 0.98 (0.93, 0.99)<br>[0.95], $p = .18$                   | 0.82 (0.53, 0.94)<br>[0.83], $p = .17$                   | 0.97 (0.89, 0.99)<br>[0.97], $p = .43$                   | 0.72 (0.03, 0.95)<br>[1], $p = .16$                      | 0.91 (0.76, 0.96)<br>[0.91], $p = .26$                   |
| Syntactic            | NBD     | Noun/verb    | 0.25 (-0.41, 0.71)<br>[0.52], $p = .42$                  | 0.24 (-0.43, 0.71)<br>[0.22], $p = .79$                  | N/A                                                      | N/A                                                      | N/A                                                      | N/A                                                      |
|                      | Aphasia |              | 0.86 (0.58, 0.96)<br>[0.86], $p = .90$                   | 0.50 (-0.02, 0.82)<br>[0.58], $p = .15$                  | 0.36 (-0.20, 0.74)<br>[0.58], $p = .63$                  | 0.72 (0.15, 0.93)<br>[0.76], $p = .04$                   | 0.78 (0.01, 0.97)<br>[0.77], $p = .84$                   | 0.68 (0.30, 0.87)<br>[0.68], $p = .07$                   |
|                      | NBD     | Open/closed  | 0.18 (-0.33, 0.65)<br>[0.27], $p = .20$                  | 0.24 (-0.32, 0.69)<br>[0.10], $p = .27$                  | N/A                                                      | N/A                                                      | N/A                                                      | N/A                                                      |
|                      | Aphasia |              | 0.82 (0.45, 0.95)<br>[0.72], $p = .58$                   | 0.63 (0.10, 0.88)<br>[0.90], $p = .91$                   | 0.75 (0.40, 0.91)<br>[0.57], $p = .36$                   | 0.78 (0.24, 0.95)<br>[0.43], $p = .55$                   | 0.75 (-0.11, 0.96)<br>[0.89], $p > .99$                  | 0.78 (0.48, 0.92)<br>[0.41], $p = .25$                   |
|                      | NBD     | MLU          | 0.48 (-0.08, 0.81)<br>[0.76], $p = .38$                  | 0.84 (0.54, 0.95)<br>[0.58], $p = .85$                   | N/A                                                      | N/A                                                      | N/A                                                      | N/A                                                      |
|                      | Aphasia |              | 0.71 (0.26, 0.91)<br>[0.39], $p = .32$                   | 0.96 (0.86, 0.99)<br>[0.96], $p = .13$                   | 0.79 (0.47, 0.93)<br>[0.86], $p = .15$                   | 0.82 (0.40, 0.96)<br>[0.80], $p = .73$                   | 0.81 (0.18, 0.97)<br>[0.94], $p = .31$                   | 0.83 (0.58, 0.93)<br>[0.83], $p = .78$                   |

| Proxy | Group   | Measure | Long sample length                                       | Short sample length                                     | Mild or Latent Severity ( $n = 14$ )                    | Moderate or Severe Severity ( $n = 9$ )                 | Latent Aphasia ( $n = 6$ )                              | Clinical Aphasia ( $n = 17$ )                           |
|-------|---------|---------|----------------------------------------------------------|---------------------------------------------------------|---------------------------------------------------------|---------------------------------------------------------|---------------------------------------------------------|---------------------------------------------------------|
|       |         |         | ICC (95% CI)<br>[Spearman's rho],<br>Wilcoxon $p$ -value | ICC (95% CI)<br>[Spearman's rho]<br>Wilcoxon $p$ -value |
|       | NBD     |         | 0.42 (-0.20, 0.79)<br>[0.27], $p = .79$                  | 0.88 (0.63, 0.96)<br>[0.84], $p = .42$                  | N/A                                                     | N/A                                                     | N/A                                                     | N/A                                                     |
|       | Aphasia | VerbUtt | 0.35 (-0.19, 0.76)<br>[0.06], $p = .12$                  | 0.93 (0.73, 0.98)<br>[0.95], $p = .06$                  | 0.46 (-0.03, 0.78)<br>[0.45], $p = .15$                 | 0.91 (0.64, 0.98)<br>[0.83], $p = .36$                  | 0.38 (-0.40, 0.88)<br>[0.71], $p = .31$                 | 0.83 (0.60, 0.94)<br>[0.76], $p = .82$                  |

Koo and Li (2016) gives the following suggestion for interpreting intraclass correlation coefficient (ICC), including confidence intervals: below 0.50 = poor; between 0.50 and 0.75 = moderate; between 0.75 and 0.90 = good; and above 0.90 = excellent.
