# Supplementary material
Source: publisher figshare collection journal article supplement (https://asha.figshare.com/articles/dataset/_/23298032)
Supplement: Supplementary file 7 [file 1]

**Supplemental Table S6.** Summary of test-retest results for the Sandwich task (procedural "how to" narrative).

Koo and Li (2016) gives the following suggestion for interpreting ICC: below 0.50 = poor; between 0.50 and 0.75 = moderate; between 0.75 and 0.90 = good; and above 0.90 = excellent. Lin's concordance correlation coefficient (CCC) is given in cases where ICC is poor, to identify if this improves the estimate. If it does improve the estimate, it suggests that test-retest the low ICC is due to lack of spread (i.e., lack of true intra-group variability).

| Primary Proxy               | Measure      | Group   | ICC (CCC)      | 95% ICC CI (95% CCC CI)      | Koo & Li (2016) ICC Quality (CI Quality)   | Spearman's rho ( <i>p</i> -value) | Systematic difference     | SEM / MDC90   |
|-----------------------------|--------------|---------|----------------|------------------------------|--------------------------------------------|-----------------------------------|---------------------------|---------------|
| Lexical and informativeness | %CIU         | NBD     | 0.10<br>(0.10) | -0.33, 0.49<br>(-0.28, 0.45) | Poor (Poor)<br>CCC remains poor            | -0.10 ( <i>p</i> = .64)           | V = 149, <i>p</i> = .99   | 0.03          |
|                             |              | Aphasia | 0.71           | 0.43, 0.87                   | Moderate (Poor – Good)                     | 0.74 ( <i>p</i> < .0001)*^        | V = 140, <i>p</i> = .96   | 0.12 / 0.28   |
|                             | PI Density   | NBD     | 0.11<br>(0.11) | -0.31, 0.49<br>(-0.30, 0.48) | Poor (Poor)<br>CCC remains poor            | 0.08 ( <i>p</i> = .70)            | V = 138, <i>p</i> = .74   | 0.02          |
|                             |              | Aphasia | 0.84           | 0.66, 0.93                   | Good (Moderate – Exc.)                     | 0.69 ( <i>p</i> = .0002)*^        | V = 145, <i>p</i> = .84   | 0.03 / 0.08   |
|                             | TTR          | NBD     | 0.70           | 0.41, 0.86                   | Moderate (Poor – Good)                     | 0.64 ( <i>p</i> = .0008)*^        | V = 188, <i>p</i> = .28   | 0.03          |
|                             |              | Aphasia | 0.69           | 0.39, 0.86                   | Moderate (Poor – Good)                     | 0.75 ( <i>p</i> < .0001)*^        | V = 150, <i>p</i> = .73   | 0.08 / 0.18   |
|                             | Tokens       | NBD     | 0.80           | 0.59, 0.91                   | Good (Moderate – Exc.)                     | 0.82 ( <i>p</i> < .0001)*^        | V = 69.5, <i>p</i> = .02* | 121.26        |
|                             |              | Aphasia | 0.73           | 0.47, 0.88                   | Moderate (Poor – Good)                     | 0.89 ( <i>p</i> < .0001)*^        | V = 92, <i>p</i> = .27    | 28.52 / 66.55 |
| Fluency / efficiency        | CIUs / min   | NBD     | 0.41<br>(0.40) | 0.03, 0.69<br>(0.02, 0.68)   | Poor (Poor – Moderate)<br>CCC remains poor | 0.42 ( <i>p</i> = .04)*           | V = 188, <i>p</i> = .29   | 12.77         |
|                             |              | Aphasia | 0.90           | 0.78, 0.96                   | Excellent (Good – Exc.)                    | 0.87 ( <i>p</i> < .0001)*^        | V = 137, <i>p</i> = .99   | 13.49 / 31.48 |
|                             | SpeakingSecs | NBD     | 0.79           | 0.55, 0.91                   | Moderate (Good – Exc.)                     | 0.83 ( <i>p</i> < .0001)*^        | V = 69, <i>p</i> = .02*   | 61.47         |
|                             |              | Aphasia | 0.73           | 0.47, 0.87                   | Moderate (Poor – Good)                     | 0.81 ( <i>p</i> < .0001)*^        | V = 120, <i>p</i> = .60   | 22.89 / 53.41 |
|                             | WPM          | NBD     | 0.55           | 0.19, 0.77                   | Moderate (Poor – Good)                     | 0.57 ( <i>p</i> = .004)*^         | V = 175, <i>p</i> = .49   | 14.56         |
|                             |              | Aphasia | 0.94           | 0.87, 0.98                   | Excellent (Moderate – Exc.)                | 0.95 ( <i>p</i> < .0001)*^        | V = 87, <i>p</i> = .13    | 11.15 / 26.01 |
| Syntactic                   | MLU          | NBD     | 0.29<br>(0.28) | -0.13, 0.62<br>(-0.12, 0.60) | Poor (Poor – Moderate)<br>CCC remains poor | 0.23 ( <i>p</i> = .27)            | V = 114, <i>p</i> = .48   | 1.26          |
|                             |              | Aphasia | 0.81           | 0.60, 0.91                   | Good (Moderate – Exc.)                     | 0.78 ( <i>p</i> < .0001)*^        | V = 145.5, <i>p</i> = .83 | 1.44 / 3.37   |
|                             | Noun/verb    | NBD     | 0.52           | 0.16, 0.76                   | Moderate (Poor – Good)                     | 0.69 ( <i>p</i> = .0003)*^        | V = 183, <i>p</i> = .36   | 0.14          |
|                             |              | Aphasia | 0.22<br>(0.21) | -0.24, 0.59<br>(-0.22, 0.57) | Poor (Poor – Moderate)<br>CCC remains poor | 0.56 ( <i>p</i> = .007)*^         | V = 110, <i>p</i> = .61   | 2.01 / 4.70   |

| Primary Proxy | Measure     | Group   | ICC (CCC)      | 95% ICC CI (95% CCC CI)      | Koo & Li (2016) ICC Quality (CI Quality)   | Spearman's rho ( <i>p</i> -value) | Systematic difference   | SEM / MDC90 |
|---------------|-------------|---------|----------------|------------------------------|--------------------------------------------|-----------------------------------|-------------------------|-------------|
|               | Open/closed | NBD     | 0.33<br>(0.32) | -0.09, 0.64<br>(-0.05, 0.61) | Poor (Poor – Moderate)<br>CCC remains poor | 0.14 ( <i>p</i> = .52)            | V = 144, <i>p</i> = .87 | 0.04        |
|               |             | Aphasia | 0.77           | 0.53, 0.90                   | Good (Moderate – Exc.)                     | 0.70 ( <i>p</i> = .0002)*^        | V = 138, <i>p</i> > .99 | 0.30 / 0.70 |
|               | VerbUtt     | NBD     | 0.11<br>(0.10) | -0.28, 0.47<br>(-0.27, 0.45) | Poor (Poor)<br>CCC remains poor            | -0.08 ( <i>p</i> = .70)           | V = 105, <i>p</i> = .21 | 0.22        |
|               |             | Aphasia | 0.69           | 0.40, 0.86                   | Moderate (Poor – Good)                     | 0.73 ( <i>p</i> < .0001)*^        | V = 134, <i>p</i> = .53 | 0.31 / 0.72 |

CCC = Concordance correlation coefficient; CI = confidence interval; %CIU = Percentage of correct information units; CIUs/min = correct information units per minute; MLU = mean length of utterance (in words); VerbUtt = verbs per utterance; Noun/verb = noun-to-verb ratio; Open/closed = open-to-closed class word ratio; SpeakingSecs = speaking duration in seconds; PI Density = propositional idea density; TTR = type-token ratio; WPM = words per minute; MDC90 = Minimal detectable change at 90% confidence.

\* = significant; ^ = significant after Bonferroni correction (11 row-wise within group corrections; new *p* < .0045).
