# Supplementary material
Source: publisher figshare collection journal article supplement (https://asha.figshare.com/articles/dataset/_/23298032)
Supplement: Supplementary file 8 [file 1]

**Supplemental Table S7.** Summary of test-retest results for the Broken Window task (describing a picture sequence).

Koo and Li (2016) gives the following suggestion for interpreting ICC: below 0.50 = poor; between 0.50 and 0.75 = moderate; between 0.75 and 0.90 = good; and above 0.90 = excellent. Lin's concordance correlation coefficient (CCC) is given in cases where ICC is poor, to identify if this improves the estimate. If it does improve the estimate, it suggests that test-retest the low ICC is due to lack of spread (i.e., lack of true intra-group variability).

| Primary Proxy               | Measure      | Group   | ICC (CCC)      | 95% ICC CI (95% CCC CI)      | Koo & Li (2016) ICC Quality (CI Quality)   | Spearman's rho (p-value) | Systematic difference | SEM / MDC90   |
|-----------------------------|--------------|---------|----------------|------------------------------|--------------------------------------------|--------------------------|-----------------------|---------------|
| Lexical and informativeness | %CIU         | NBD     | 0.87           | 0.72, 0.94                   | Good (Moderate – Exc.)                     | 0.79 ( $p < .0001$ )*^   | $V = 137, p = .73$    | 0.07          |
|                             |              | Aphasia | 0.65           | 0.32, 0.83                   | Moderate (Poor – Good)                     | 0.57 ( $p = .006$ )*^    | $V = 124, p = .69$    | 0.14 / 0.32   |
|                             | PI Density   | NBD     | 0.15<br>(0.15) | -0.25, 0.51<br>(-0.23, 0.49) | Poor (Poor – Moderate)<br>CCC remains poor | 0.18 ( $p = .40$ )       | $V = 177.5, p = .44$  | 0.04          |
|                             |              | Aphasia | 0.67           | 0.37, 0.84                   | Moderate (Poor – Good)                     | 0.77 ( $p < .0001$ )*^   | $V = 97, p = .35$     | 0.06 / 0.14   |
|                             | TTR          | NBD     | 0.50           | 0.13, 0.75                   | Moderate (Poor – Good)                     | 0.60 ( $p = .003$ )*^    | $V = 221, p = .04^*$  | 0.06          |
|                             |              | Aphasia | 0.84           | 0.66, 0.93                   | Good (Moderate – Exc.)                     | 0.81 ( $p < .0001$ )*^   | $V = 157, p = .33$    | 0.06 / 0.13   |
|                             | Tokens       | NBD     | 0.67           | 0.37, 0.84                   | Moderate (Poor – Good)                     | 0.68 ( $p = .0002$ )*^   | $V = 70, p = .04^*$   | 26.39         |
|                             |              | Aphasia | 0.78           | 0.54, 0.90                   | Good (Moderate – Exc.)                     | 0.95 ( $p < .0001$ )*^   | $V = 49, p = .02^*$   | 32.39 / 75.58 |
| Fluency / efficiency        | CIUs / min   | NBD     | 0.77           | 0.54, 0.89                   | Good (Moderate – Good)                     | 0.80 ( $p < .0001$ )*^   | $V = 123, p = .46$    | 18.19         |
|                             |              | Aphasia | 0.89           | 0.75, 0.95                   | Good (Moderate – Exc.)                     | 0.90 ( $p < .0001$ )*^   | $V = 97, p = .22$     | 12.19 / 28.44 |
|                             | SpeakingSecs | NBD     | 0.73           | 0.47, 0.87                   | Moderate (Poor – Good)                     | 0.71 ( $p = .0001$ )*^   | $V = 97, p = .13$     | 11.21         |
|                             |              | Aphasia | 0.69           | 0.41, 0.86                   | Moderate (Poor – Good)                     | 0.75 ( $p < .0001$ )*^   | $V = 105, p = .50$    | 24.49 / 57.15 |
|                             | WPM          | NBD     | 0.77           | 0.54, 0.89                   | Good (Moderate – Good)                     | 0.63 ( $p = .001$ )*^    | $V = 110, p = .26$    | 14.36         |
|                             |              | Aphasia | 0.91           | 0.81, 0.96                   | Excellent (Good – Exc.)                    | 0.91 ( $p < .0001$ )*^   | $V = 108, p = .38$    | 10.80 / 25.20 |
|                             | MLU          | NBD     | 0.22<br>(0.21) | -0.21, 0.57<br>(-0.19, 0.56) | Poor (Poor – Moderate)<br>CCC remains poor | 0.17 ( $p = .43$ )       | $V = 137, p = .72$    | 2.17          |
|                             |              | Aphasia | 0.77           | 0.54, 0.90                   | Good (Moderate – Exc.)                     | 0.72 ( $p = .0001$ )*^   | $V = 130, p = .82$    | 1.63 / 3.81   |
| Syntactic                   | Noun/verb    | NBD     | 0.11<br>(0.10) | -0.30, 0.48<br>(-0.29, 0.46) | Poor (Poor)<br>CCC remains poor            | 0.03 ( $p = .90$ )       | $V = 180, p = .39$    | 0.34          |
|                             |              | Aphasia | 0.74           | 0.47, 0.88                   | Moderate (Poor – Good)                     | 0.83 ( $p < .0001$ )*^   | $V = 119, p = .92$    | 0.59 / 1.37   |
|                             | Open/closed  | NBD     | 0.49           | 0.10, 0.74                   | Poor (Poor – Moderate)                     | 0.40 ( $p = .05$ )       | $V = 233, p = .02^*$  | 0.15          |
|                             |              | Aphasia | 0.08           | -0.32, 0.46                  | Poor (Poor)                                | 0.37 ( $p = .08$ )       | $V = 169, p = .36$    | 0.38 / 0.90   |

| Primary Proxy | Measure | Group   | ICC (CCC) | 95% ICC CI (95% CCC CI) | Koo & Li (2016) ICC Quality (CI Quality) | Spearman's rho ( <i>p</i> -value) | Systematic difference   | SEM / MDC90 |
|---------------|---------|---------|-----------|-------------------------|------------------------------------------|-----------------------------------|-------------------------|-------------|
|               |         |         | (0.08)    | (-0.22, 0.36)           | CCC remains poor                         |                                   |                         |             |
|               | VerbUtt | NBD     | -0.002    | -0.42, 0.40             | Poor (Poor)                              | 0.06 ( <i>p</i> = .77)            | V = 104, <i>p</i> = .31 | 0.34        |
|               |         |         | (-0.002)  | (-0.36, 0.36)           | CCC remains poor                         |                                   |                         |             |
|               |         | Aphasia | 0.76      | 0.51, 0.89              | Good (Moderate – Good)                   | 0.71 ( <i>p</i> = .0001)*^        | V = 104, <i>p</i> = .48 | 0.31 / 0.72 |

CCC = Concordance correlation coefficient; CI = confidence interval; %CIU = Percentage of correct information units; CIUs/min = correct information units per minute; MLU = mean length of utterance (in words); VerbUtt = verbs per utterance; Noun/verb = noun-to-verb ratio; Open/closed = open-to-closed class word ratio; SpeakingSecs = speaking duration in seconds; PI Density = propositional idea density; TTR = type-token ratio; WPM = words per minute; MDC90 = Minimal detectable change at 90% confidence.

\* = significant; ^ = significant after Bonferroni correction (11 row-wise within group corrections; new *p* < .0045).
