# Supplementary material
Source: publisher figshare collection journal article supplement (https://asha.figshare.com/articles/dataset/_/23298032)
Supplement: Supplementary file 9 [file 1]

**Supplemental Table S12.** Summary of test-retest results for the Broken Window picture sequence.

Given that sample length (in both subject groups) and aphasia severity (Aphasia group only) may affect discourse measure reliability, here we stratify ICC, Spearman's rho, and Wilcoxon's signed rank test *p*-value by each factor. Sample length is the average sample length across all discourse tasks (*n* = 12 in each sample length group for NBD group (Med = 91.5 words); *n* = 11 in long sample and *n* = 12 in short sample length group for Aphasia group (Med = 54.5 words)).

| Proxy                       | Group   | Measure    | Long sample length                                           | Short sample length                                          | Mild or Latent Severity ( <i>n</i> = 14)                     | Moderate or Severe Severity ( <i>n</i> = 9)                  | Latent Aphasia ( <i>n</i> = 6)                               | Clinical Aphasia ( <i>n</i> = 17)                            |
|-----------------------------|---------|------------|--------------------------------------------------------------|--------------------------------------------------------------|--------------------------------------------------------------|--------------------------------------------------------------|--------------------------------------------------------------|--------------------------------------------------------------|
|                             |         |            | ICC (95% CI)<br>[Spearman's rho]<br>Wilcoxon <i>p</i> -value |
| Lexical and informativeness | NBD     | %CIU       | 0.87 (0.62, 0.96)<br>[0.83], <i>p</i> = .38                  | 0.69 (0.20, 0.90)<br>[0.44], <i>p</i> = .73                  | N/A                                                          | N/A                                                          | N/A                                                          | N/A                                                          |
|                             | Aphasia |            | 0.74 (0.31, 0.92)<br>[0.71], <i>p</i> = .24                  | 0.58 (0.02, 0.86)<br>[0.48], <i>p</i> = .85                  | 0.47 (-0.09, 0.80)<br>[0.48], <i>p</i> = .86                 | 0.58 (-0.13, 0.89)<br>[0.55], <i>p</i> = .82                 | 0.72 (-0.08, 0.96)<br>[0.60], <i>p</i> = .06                 | 0.59 (0.16, 0.83)<br>[0.50], <i>p</i> = .71                  |
|                             | NBD     | PI Density | 0.39 (-0.23, 0.78)<br>[0.48], <i>p</i> = .91                 | 0.0003 (-0.55, 0.55)<br>[0.06], <i>p</i> = .47               | N/A                                                          | N/A                                                          | N/A                                                          | N/A                                                          |
|                             | Aphasia |            | 0.87 (0.58, 0.96)<br>[0.92], <i>p</i> = .90                  | 0.48 (-0.08, 0.82)<br>[0.51], <i>p</i> = .23                 | 0.94 (0.82, 0.98)<br>[0.90], <i>p</i> = .11                  | 0.47 (-0.27, 0.85)<br>[0.51], <i>p</i> > .99                 | 0.70 (-0.24, 0.95)<br>[0.77], <i>p</i> > .99                 | 0.65 (0.27, 0.86)<br>[0.73], <i>p</i> = .34                  |
|                             | NBD     | TTR        | 0.13 (-0.39, 0.63)<br>[0.30], <i>p</i> = .27                 | 0.53 (0.01, 0.83)<br>[0.51], <i>p</i> = .06                  | N/A                                                          | N/A                                                          | N/A                                                          | N/A                                                          |
|                             | Aphasia |            | 0.76 (0.34, 0.93)<br>[0.79], <i>p</i> = .32                  | 0.65 (0.14, 0.89)<br>[0.57], <i>p</i> = .82                  | 0.79 (0.49, 0.93)<br>[0.70], <i>p</i> = .21                  | 0.88 (0.54, 0.97)<br>[0.83], <i>p</i> > .99                  | 0.75 (-0.11, 0.96)<br>[0.43], <i>p</i> > .99                 | 0.86 (0.67, 0.95)<br>[0.86], <i>p</i> = .31                  |
|                             | NBD     | Tokens     | 0.25 (-0.38, 0.71)<br>[0.35], <i>p</i> = .57                 | 0.31 (-0.13, 0.71)<br>[0.62], <i>p</i> = .004                | N/A                                                          | N/A                                                          | N/A                                                          | N/A                                                          |
|                             | Aphasia |            | 0.66 (0.17, 0.89)<br>[0.72], <i>p</i> = .02                  | 0.72 (0.29, 0.91)<br>[0.83], <i>p</i> = .45                  | 0.73 (0.35, 0.90)<br>[0.88], <i>p</i> = .03                  | 0.96 (0.82, 0.99)<br>[0.95], <i>p</i> = .05                  | 0.68 (-0.01, 0.95)<br>[0.71], <i>p</i> = .09                 | 0.96 (0.90, 0.99)<br>[0.94], <i>p</i> = .16                  |

| Proxy                | Group   | Measure      | Long sample length                                      | Short sample length                                     | Mild or Latent Severity ( $n = 14$ )                    | Moderate or Severe Severity ( $n = 9$ )                 | Latent Aphasia ( $n = 6$ )                              | Clinical Aphasia ( $n = 17$ )                           |
|----------------------|---------|--------------|---------------------------------------------------------|---------------------------------------------------------|---------------------------------------------------------|---------------------------------------------------------|---------------------------------------------------------|---------------------------------------------------------|
|                      |         |              | ICC (95% CI)<br>[Spearman's rho]<br>Wilcoxon $p$ -value |
| Fluency / efficiency | NBD     | CIUs/min     | 0.70 (0.22, 0.90)<br>[0.73], $p = .68$                  | 0.78 (0.40, 0.93)<br>[0.77], $p = .57$                  | N/A                                                     | N/A                                                     | N/A                                                     | N/A                                                     |
|                      | Aphasia |              | 0.81 (0.45, 0.94)<br>[0.78], $p = .41$                  | 0.91 (0.74, 0.97)<br>[0.89], $p = .42$                  | 0.86 (0.62, 0.95)<br>[0.78], $p = .67$                  | 0.90 (0.59, 0.98)<br>[0.85], $p = .25$                  | 0.79 (0.10, 0.97)<br>[0.77], $p = .44$                  | 0.89 (0.72, 0.96)<br>[0.90], $p = .24$                  |
|                      | NBD     | SpeakingSecs | 0.45 (-0.17, 0.81)<br>[0.37], $p = .97$                 | 0.66 (0.04, 0.90)<br>[0.52], $p = .01$                  | N/A                                                     | N/A                                                     | N/A                                                     | N/A                                                     |
|                      | Aphasia |              | 0.61 (0.10, 0.88)<br>[0.85], $p = .37$                  | 0.83 (0.50, 0.95)<br>[0.61], $p = .97$                  | 0.64 (0.21, 0.87)<br>[0.74], $p = .38$                  | 0.84 (0.45, 0.96)<br>[0.78], $p = .73$                  | 0.63 (-0.10, 0.94)<br>[0.20], $p = .16$                 | 0.85 (0.63, 0.94)<br>[0.82], $p = .86$                  |
|                      | NBD     | WPM          | 0.24 (-0.40, 0.71)<br>[-0.01], $p = .85$                | 0.86 (0.60, 0.96)<br>[0.82], $p = .20$                  | N/A                                                     | N/A                                                     | N/A                                                     | N/A                                                     |
|                      | Aphasia |              | 0.90 (0.63, 0.97)<br>[0.93], $p = .05$                  | 0.83 (0.51, 0.95)<br>[0.82], $p = .68$                  | 0.92 (0.76, 0.97)<br>[0.95], $p = .14$                  | 0.90 (0.63, 0.98)<br>[0.88], $p = .73$                  | 0.88 (0.45, 0.98)<br>[1], $p = .44$                     | 0.90 (0.74, 0.96)<br>[0.87], $p = .64$                  |
| Syntactic            | NBD     | Noun/verb    | 0.05 (-0.47, 0.58)<br>[0.31], $p = .27$                 | -0.005 (-0.63, 0.57)<br>[-0.14], $p = .88$              | N/A                                                     | N/A                                                     | N/A                                                     | N/A                                                     |
|                      | Aphasia |              | 0.80 (0.45, 0.94)<br>[0.82], $p = .15$                  | 0.72 (0.27, 0.91)<br>[0.87], $p = .42$                  | 0.69 (0.29, 0.89)<br>[0.72], $p = .95$                  | 0.83 (0.35, 0.96)<br>[0.99], $p = .67$                  | 0.03 (-0.97, 0.79)<br>[0.35], $p = .69$                 | 0.75 (0.42, 0.90)<br>[0.93], $p = .55$                  |
|                      | NBD     | Open/closed  | 0.09 (-0.44, 0.60)<br>[0.22], $p = .34$                 | 0.56 (0.002, 0.85)<br>[0.63], $p = .03$                 | N/A                                                     | N/A                                                     | N/A                                                     | N/A                                                     |
|                      | Aphasia |              | 0.84 (0.51, 0.95)<br>[0.60], $p = .64$                  | 0.004 (-0.52, 0.55)<br>[0.24], $p = .34$                | 0.58 (0.10, 0.84)<br>[0.51], $p = .24$                  | -0.006 (-0.63, 0.63)<br>[0.05], $p = .73$               | 0.81 (0.23, 0.97)<br>[0.60], $p = .31$                  | 0.002 (-0.46, 0.47)<br>[0.34], $p = .68$                |

| Proxy | Group   | Measure | Long sample length                                      | Short sample length                                     | Mild or Latent Severity ( $n = 14$ )                    | Moderate or Severe Severity ( $n = 9$ )                 | Latent Aphasia ( $n = 6$ )                              | Clinical Aphasia ( $n = 17$ )                           |
|-------|---------|---------|---------------------------------------------------------|---------------------------------------------------------|---------------------------------------------------------|---------------------------------------------------------|---------------------------------------------------------|---------------------------------------------------------|
|       |         |         | ICC (95% CI)<br>[Spearman's rho]<br>Wilcoxon $p$ -value |
|       | NBD     | MLU     | 0.33 (-0.32, 0.75)<br>[0.08], $p = .68$                 | 0.16 (-0.50, 0.67)<br>[0.11], $p = .91$                 | N/A                                                     | N/A                                                     | N/A                                                     | N/A                                                     |
|       | Aphasia |         | 0.69 (0.21, 0.91)<br>[0.46], $p = .70$                  | 0.74 (0.29, 0.92)<br>[0.77], $p = .97$                  | 0.52 (-0.01, 0.82)<br>[0.42], $p = .63$                 | 0.81 (0.34, 0.95)<br>[0.80], $p = .50$                  | 0.56 (-0.14, 0.92)<br>[0.60], $p = .22$                 | 0.81 (0.56, 0.93)<br>[0.82], $p = .46$                  |
|       | NBD     | VerbUtt | 0.39 (-0.16, 0.77)<br>[0.38], $p = .09$                 | -0.14 (-0.71, 0.48)<br>[-0.05], $p > .99$               | N/A                                                     | N/A                                                     | N/A                                                     | N/A                                                     |
|       | Aphasia |         | 0.47 (-0.07, 0.82)<br>[0.40], $p = .10$                 | 0.72 (0.27, 0.91)<br>[0.64], $p = .79$                  | 0.53 (0.04, 0.82)<br>[0.45], $p = .33$                  | 0.79 (0.32, 0.95)<br>[0.73], $p = .91$                  | 0.42 (-0.20, 0.88)<br>[0.32], $p = .06$                 | 0.76 (0.45, 0.91)<br>[0.75], $p = .85$                  |

Koo and Li (2016) gives the following suggestion for interpreting intraclass correlation coefficient (ICC), including confidence intervals: below 0.50 = poor; between 0.50 and 0.75 = moderate; between 0.75 and 0.90 = good; and above 0.90 = excellent.
