# Supplementary material
Source: publisher figshare collection journal article supplement (https://asha.figshare.com/articles/dataset/_/23298032)
Supplement: Supplementary file 10 [file 1]

**Supplemental Table S2.** Summary of test-retest results across tasks, stratified by sample length and aphasia severity.

Given that sample length (in both subject groups) and aphasia severity (Aphasia group only) may affect discourse measure reliability, here we stratify ICC, Spearman's rho, and Wilcoxon's signed rank test *p*-value by each factor. Sample length is the average sample length across all discourse tasks (*n* = 12 in each sample length group for NBD group (Med = 437.8 words); *n* = 11 in long sample and *n* = 12 in short sample length group for Aphasia group (Med = 229 words)).

| Proxy                       | Group   | Measure    | Long sample length                                           | Short sample length                                          | Mild or Latent Severity ( <i>n</i> = 14)                     | Moderate or Severe Severity ( <i>n</i> = 9)                  | Latent Aphasia ( <i>n</i> = 6)                               | Clinical Aphasia ( <i>n</i> = 17)                            |
|-----------------------------|---------|------------|--------------------------------------------------------------|--------------------------------------------------------------|--------------------------------------------------------------|--------------------------------------------------------------|--------------------------------------------------------------|--------------------------------------------------------------|
|                             |         |            | ICC (95% CI)<br>[Spearman's rho]<br>Wilcoxon <i>p</i> -value |
| Lexical and informativeness | NBD     | %CIU       | 0.94 (0.8, 0.98)<br>[0.81], <i>p</i> = .03                   | 0.61 (0.05, 0.87)<br>[0.71], <i>p</i> = .85                  | N/A                                                          | N/A                                                          | N/A                                                          | N/A                                                          |
|                             | Aphasia |            | 0.91 (0.72, 0.98)<br>[0.75], <i>p</i> = .32                  | 0.94 (0.73, 0.98)<br>[0.94], <i>p</i> = .02*                 | 0.89 (0.70, 0.96)<br>[0.79], <i>p</i> = .22                  | 0.91 (0.45, 0.98)<br>[0.87], <i>p</i> = .04*                 | 0.62 (-0.29, 0.94)<br>[0.49], <i>p</i> = .56                 | 0.95 (0.83, 0.98)<br>[0.94], <i>p</i> = .02*                 |
|                             | NBD     | PI Density | 0.28 (-0.35, 0.72)<br>[0.34], <i>p</i> = .53                 | 0.15 (-0.50, 0.66)<br>[0.30], <i>p</i> = .91                 | N/A                                                          | N/A                                                          | N/A                                                          | N/A                                                          |
|                             | Aphasia |            | 0.76 (0.29, 0.93)<br>[0.78], <i>p</i> = .07                  | 0.93 (0.78, 0.98)<br>[0.86], <i>p</i> = .30                  | 0.92 (0.76, 0.97)<br>[0.86], <i>p</i> = .19                  | 0.93 (0.74, 0.98)<br>[0.97], <i>p</i> = .20                  | 0.65 (-0.17, 0.94)<br>[0.60], <i>p</i> = .44                 | 0.94 (0.84, 0.98)<br>[0.90], <i>p</i> = .07                  |
|                             | NBD     | TTR        | 0.43 (-0.19, 0.80)<br>[0.20], <i>p</i> = .68                 | 0.58 (-0.05, 0.87)<br>[0.78], <i>p</i> = .01                 | N/A                                                          | N/A                                                          | N/A                                                          | N/A                                                          |
|                             | Aphasia |            | 0.72 (0.16, 0.92)<br>[0.66], <i>p</i> = .04*                 | 0.88 (0.62, 0.97)<br>[0.88], <i>p</i> = .13                  | 0.83 (0.56, 0.94)<br>[0.90], <i>p</i> = .36                  | 0.94 (0.78, 0.99)<br>[0.93], <i>p</i> = .30                  | 0.77 (-0.03, 0.97)<br>[0.37], <i>p</i> = .06                 | 0.92 (0.79, 0.97)<br>[0.93], <i>p</i> = .26                  |
|                             | NBD     | Tokens     | 0.57 (0.07, 0.85)<br>[0.29], <i>p</i> = .11                  | 0.70 (-0.01, 0.92)<br>[0.78], <i>p</i> = .005                | N/A                                                          | N/A                                                          | N/A                                                          | N/A                                                          |
|                             | Aphasia |            | 0.57 (-0.06, 0.87)<br>[0.76], <i>p</i> = .002*^              | 0.93 (0.77, 0.98)<br>[0.92], <i>p</i> = .27                  | 0.72 (0.24, 0.90)<br>[0.79], <i>p</i> = .004*^               | 0.96 (0.82, 0.99)<br>[0.95], <i>p</i> = .05                  | 0.52 (-0.15, 0.91)<br>[0.66], <i>p</i> = .03*                | 0.93 (0.77, 0.98)<br>[0.97], <i>p</i> = .03*                 |

| Proxy                | Group   | Measure      | Long sample length                                      | Short sample length                                     | Mild or Latent Severity ( $n = 14$ )                    | Moderate or Severe Severity ( $n = 9$ )                 | Latent Aphasia ( $n = 6$ )                              | Clinical Aphasia ( $n = 17$ )                           |
|----------------------|---------|--------------|---------------------------------------------------------|---------------------------------------------------------|---------------------------------------------------------|---------------------------------------------------------|---------------------------------------------------------|---------------------------------------------------------|
|                      |         |              | ICC (95% CI)<br>[Spearman's rho]<br>Wilcoxon $p$ -value |
| Fluency / efficiency | NBD     | CIUs/min     | 0.91 (0.70, 0.97)<br>[0.90], $p = .21$                  | 0.81 (0.46, 0.94)<br>[0.72], $p = .68$                  | N/A                                                     | N/A                                                     | N/A                                                     | N/A                                                     |
|                      | Aphasia |              | 0.90 (0.66, 0.97)<br>[0.87], $p = .83$                  | 0.96 (0.88, 0.99)<br>[0.92], $p = .20$                  | 0.94 (0.83, 0.98)<br>[0.91], $p = .81$                  | 0.97 (0.86, 0.99)<br>[0.95], $p = .50$                  | 0.90 (0.45, 0.99)<br>[0.83], $p = .84$                  | 0.95 (0.88, 0.98)<br>[0.94], $p = .35$                  |
|                      | NBD     | SpeakingSecs | 0.63 (0.14, 0.88)<br>[0.34], $p = .09$                  | 0.73 (0.22, 0.92)<br>[0.70], $p = .04$                  | N/A                                                     | N/A                                                     | N/A                                                     | N/A                                                     |
|                      | Aphasia |              | 0.57 (0.02, 0.86)<br>[0.78], $p = .02^*$                | 0.91 (0.72, 0.97)<br>[0.84], $p = .47$                  | 0.63 (0.19, 0.86)<br>[0.69], $p = .08$                  | 0.95 (0.79, 0.99)<br>[0.98], $p = .25$                  | 0.51 (-0.16, 0.91)<br>[0.54], $p = .03^*$               | 0.87 (0.68, 0.95)<br>[0.92], $p = .21$                  |
|                      | NBD     | WPM          | 0.84 (0.49, 0.95)<br>[0.85], $p = .08$                  | 0.78 (0.40, 0.93)<br>[0.78], $p = .68$                  | N/A                                                     | N/A                                                     | N/A                                                     | N/A                                                     |
|                      | Aphasia |              | 0.92 (0.73, 0.98)<br>[0.86], $p = .37$                  | 0.98 (0.93, 0.99)<br>[0.95], $p = .18$                  | 0.94 (0.84, 0.98)<br>[0.94], $p = .24$                  | 0.99 (0.97, 0.999)<br>[0.98], $p = .30$                 | 0.90 (0.49, 0.99)<br>[0.77], $p = .69$                  | 0.97 (0.92, 0.99)<br>[0.96], $p = .13$                  |
| Syntactic            | NBD     | Noun/verb    | 0.50 (-0.11, 0.83)<br>[0.39], $p = .73$                 | 0.27 (-0.36, 0.72)<br>[0.31], $p = .85$                 | N/A                                                     | N/A                                                     | N/A                                                     | N/A                                                     |
|                      | Aphasia |              | 0.86 (0.58, 0.96)<br>[0.86], $p = .90$                  | 0.50 (-0.02, 0.82)<br>[0.58], $p = .15$                 | 0.79 (0.48, 0.93)<br>[0.76], $p = .24$                  | 0.49 (-0.19, 0.86)<br>[0.67], $p = .73$                 | 0.67 (-0.29, 0.95)<br>[0.60], $p = .56$                 | 0.59 (0.19, 0.83)<br>[0.82], $p = .33$                  |
|                      | NBD     | Open/closed  | 0.12 (-0.54, 0.65)<br>[0.27], $p = .57$                 | 0.57 (0.01, 0.86)<br>[0.47], $p = .02$                  | N/A                                                     | N/A                                                     | N/A                                                     | N/A                                                     |
|                      | Aphasia |              | 0.82 (0.45, 0.95)<br>[0.72], $p = .58$                  | 0.63 (0.1, 0.88)<br>[0.90], $p = .91$                   | 0.97 (0.90, 0.99)<br>[0.84], $p = .67$                  | 0.48 (-0.29, 0.86)<br>[0.70], $p = .65$                 | 0.86 (0.26, 0.98)<br>[0.89], $p > .99$                  | 0.69 (0.32, 0.88)<br>[0.87], $p = .96$                  |
|                      | NBD     | MLU          | 0.62 (0.11, 0.87)<br>[0.66], $p = .42$                  | 0.64 (0.15, 0.88)<br>[0.46], $p = .57$                  | N/A                                                     | N/A                                                     | N/A                                                     | N/A                                                     |
|                      | Aphasia |              | 0.71 (0.26, 0.91)<br>[0.39], $p = .32$                  | 0.96 (0.86, 0.99)<br>[0.96], $p = .13$                  | 0.88 (0.67, 0.96)<br>[0.67], $p = .81$                  | 0.92 (0.70, 0.98)<br>[0.93], $p > .99$                  | 0.69 (-0.01, 0.95)<br>[0.09], $p = .56$                 | 0.95 (0.86, 0.98)<br>[0.89], $p = .38$                  |

| Proxy | Group   | Measure | Long sample length                                      | Short sample length                                     | Mild or Latent Severity ( $n = 14$ )                    | Moderate or Severe Severity ( $n = 9$ )                 | Latent Aphasia ( $n = 6$ )                              | Clinical Aphasia ( $n = 17$ )                           |
|-------|---------|---------|---------------------------------------------------------|---------------------------------------------------------|---------------------------------------------------------|---------------------------------------------------------|---------------------------------------------------------|---------------------------------------------------------|
|       |         |         | ICC (95% CI)<br>[Spearman's rho]<br>Wilcoxon $p$ -value |
|       | NBD     | VerbUtt | 0.43 (-0.20, 0.80)<br>[0.59], $p = .38$                 | 0.65 (0.19, 0.88)<br>[0.27], $p = .20$                  | N/A                                                     | N/A                                                     | N/A                                                     | N/A                                                     |
|       | Aphasia |         | 0.35 (-0.19, 0.76)<br>[0.06], $p = .12$                 | 0.93 (0.73, 0.98)<br>[0.95], $p = .06$                  | 0.77 (0.42, 0.92)<br>[0.55], $p = .86$                  | 0.93 (0.72, 0.98)<br>[0.93], $p > .99$                  | 0.06 (-0.72, 0.78)<br>[-0.20], $p = .44$                | 0.92 (0.81, 0.97)<br>[0.88], $p = .43$                  |

Koo and Li (2016) gives the following suggestion for interpreting intraclass correlation coefficient (ICC), including confidence intervals: below 0.50 = poor; between 0.50 and 0.75 = moderate; between 0.75 and 0.90 = good; and above 0.90 = excellent.

\* = significant; ^ = significant after Bonferroni correction (11 row-wise within group corrections; new  $p < .0045$ )
