# Supplementary material
Source: publisher figshare collection journal article supplement (https://asha.figshare.com/articles/dataset/_/23298032)
Supplement: Supplementary file 11 [file 1]

**Supplemental Table S5.** Summary of test-retest results for the Cinderella task (retelling a fictional narrative).

Koo and Li (2016) gives the following suggestion for interpreting ICC: below 0.50 = poor; between 0.50 and 0.75 = moderate; between 0.75 and 0.90 = good; and above 0.90 = excellent. Lin's concordance correlation coefficient (CCC) is given in cases where ICC is poor, to identify if this improves the estimate. If it does improve the estimate, it suggests that test-retest the low ICC is due to lack of spread (i.e., lack of true intra-group variability).

| Primary Proxy               | Measure      | Group   | ICC (CCC)      | 95% ICC CI (95% CCC CI)      | Koo & Li (2016) ICC Quality (CI Quality)   | Spearman's rho ( <i>p</i> -value) | Systematic difference              | SEM / MDC90    |
|-----------------------------|--------------|---------|----------------|------------------------------|--------------------------------------------|-----------------------------------|------------------------------------|----------------|
| Lexical and informativeness | %CIU         | NBD     | 0.64           | 0.34, 0.83                   | Moderate (Poor – Good)                     | 0.64 ( <i>p</i> = .001)*^         | <i>V</i> = 77, <i>p</i> = .04*     | 0.03           |
|                             |              | Aphasia | 0.87           | 0.63, 0.95                   | Good (Moderate – Exc.)                     | 0.70 ( <i>p</i> = .0002)*^        | <i>V</i> = 40, <i>p</i> = .002*^   | 0.09 / 0.21    |
|                             | PI Density   | NBD     | 0.25<br>(0.24) | -0.18, 0.59<br>(-0.17, 0.58) | Poor (Poor – Good)<br>CCC remains poor     | 0.12 ( <i>p</i> = .57)            | <i>V</i> = 167.6, <i>p</i> = .63   | 0.02           |
|                             |              | Aphasia | 0.79           | 0.57, 0.90                   | Moderate (Moderate – Exc.)                 | 0.79 ( <i>p</i> < .0001)*^        | <i>V</i> = 108.5, <i>p</i> = .38   | 0.06           |
|                             | TTR          | NBD     | 0.84           | 0.62, 0.93                   | Good (Moderate – Exc.)                     | 0.85 ( <i>p</i> < .0001)*^        | <i>V</i> = 235, <i>p</i> = .01*    | 0.03           |
|                             |              | Aphasia | 0.88           | 0.64, 0.95                   | Good (Moderate – Exc.)                     | 0.90 ( <i>p</i> < .0001)*^        | <i>V</i> = 206, <i>p</i> = .01*    | 0.05 / 0.11    |
|                             | Tokens       | NBD     | 0.83           | 0.60, 0.92                   | Good (Moderate – Exc.)                     | 0.89 ( <i>p</i> < .0001)*^        | <i>V</i> = 68, <i>p</i> = .02*     | 121.26         |
|                             |              | Aphasia | 0.86           | 0.54, 0.95                   | Good (Moderate – Exc.)                     | 0.89 ( <i>p</i> < .0001)*^        | <i>V</i> = 30.5, <i>p</i> = .001*^ | 99.36 / 231.85 |
| Fluency / efficiency        | CIUs / min   | NBD     | 0.64           | 0.32, 0.82                   | Moderate (Poor – Good)                     | 0.68 ( <i>p</i> = .0003)*^        | <i>V</i> = 160, <i>p</i> = .79     | 12.77          |
|                             |              | Aphasia | 0.66           | 0.35, 0.84                   | Moderate (Poor – Good)                     | 0.66 ( <i>p</i> = .0006)*^        | <i>V</i> = 93, <i>p</i> = .18      | 19.13 / 44.65  |
|                             | SpeakingSecs | NBD     | 0.80           | 0.56, 0.91                   | Good (Moderate – Exc.)                     | 0.81 ( <i>p</i> < .0001)*^        | <i>V</i> = 74.5, <i>p</i> = .03*   | 61.47          |
|                             |              | Aphasia | 0.81           | 0.58, 0.92                   | Good (Moderate – Exc.)                     | 0.81 ( <i>p</i> < .0001)*^        | <i>V</i> = 76, <i>p</i> = .06      | 75.37 / 175.87 |
|                             | WPM          | NBD     | 0.58           | 0.24, 0.80                   | Moderate (Poor – Good)                     | 0.67 ( <i>p</i> = .0005)*^        | <i>V</i> = 138, <i>p</i> = .75     | 14.56          |
|                             |              | Aphasia | 0.95           | 0.82, 0.98                   | Excellent (Good – Exc.)                    | 0.94 ( <i>p</i> < .0001)*^        | <i>V</i> = 53, <i>p</i> = .008*^   | 7.93 / 18.50   |
| Syntactic                   | MLU          | NBD     | 0.58           | 0.23, 0.80                   | Moderate (Poor – Good)                     | 0.55 ( <i>p</i> = .007)*^         | <i>V</i> = 154, <i>p</i> = .92     | 1.26           |
|                             |              | Aphasia | 0.92           | 0.83, 0.97                   | Excellent (Good – Exc.)                    | 0.80 ( <i>p</i> < .0001)*^        | <i>V</i> = 109, <i>p</i> = .39     | 0.96 / 2.25    |
|                             | Noun/verb    | NBD     | 0.45<br>(0.44) | 0.07, 0.72<br>(0.07, 0.71)   | Poor (Poor – Moderate)<br>CCC remains poor | 0.52 ( <i>p</i> = .009)*^         | <i>V</i> = 102, <i>p</i> = .18     | 0.14           |
|                             |              | Aphasia | 0.70           | 0.41, 0.86                   | Moderate (Poor – Good)                     | 0.70 ( <i>p</i> = .0003)*^        | <i>V</i> = 110, <i>p</i> = .61     | 0.41 / 0.96    |

| Primary Proxy | Measure     | Group   | ICC (CCC)      | 95% ICC CI (95% CCC CI)   | Koo & Li (2016) ICC Quality (CI Quality)   | Spearman's rho ( <i>p</i> -value) | Systematic difference     | SEM / MDC90 |
|---------------|-------------|---------|----------------|---------------------------|--------------------------------------------|-----------------------------------|---------------------------|-------------|
|               | Open/closed | NBD     | 0.40<br>(0.39) | 0, 0.69<br>(-0.003, 0.67) | Poor (Poor – Moderate)<br>CCC remains poor | 0.45 ( <i>p</i> = .03)*           | V = 124.5, <i>p</i> = .48 | 0.04        |
|               |             | Aphasia | 0.60           | 0.24, 0.81                | Moderate (Poor – Good)                     | 0.50 ( <i>p</i> = .02)*           | V = 120, <i>p</i> = .85   | 0.18 / 0.41 |
|               | VerbUtt     | NBD     | 0.53           | 0.16, 0.77                | Moderate (Poor – Good)                     | 0.46 ( <i>p</i> = .02)*           | V = 187, <i>p</i> = .30   | 0.22        |
|               |             | Aphasia | 0.89           | 0.75, 0.95                | Good (Good – Excellent)                    | 0.66 ( <i>p</i> = .0009)*^        | V = 125, <i>p</i> = .71   | 0.24 / 0.55 |

CCC = Concordance correlation coefficient; CI = confidence interval; %CIU = Percentage of correct information units; CIUs/min = correct information units per minute; MLU = mean length of utterance (in words); VerbUtt = verbs per utterance; Noun/verb = noun-to-verb ratio; Open/closed = open-to-closed class word ratio; SpeakingSecs = speaking duration in seconds; PI Density = propositional idea density; TTR = type-token ratio; WPM = words per minute; MDC90 = Minimal detectable change at 90% confidence.

\* = significant; ^ = significant after Bonferroni correction (11 row-wise within group corrections; new *p* < .0045).
