# Supplementary material
Source: publisher figshare collection journal article supplement (https://asha.figshare.com/articles/dataset/_/23298032)
Supplement: Supplementary file 12 [file 1]

**Supplemental Table S10.** Summary of test-retest results for the Cinderella fictional narrative.

Given that sample length (in both subject groups) and aphasia severity (Aphasia group only) may affect discourse measure reliability, here we stratify ICC, Spearman's rho, and Wilcoxon's signed rank test *p*-value by each factor. Sample length is the average sample length across all discourse tasks (*n* = 12 in each sample length group for NBD group (Med = 511); *n* = 11 in long sample and *n* = 12 in short sample length group for Aphasia group (Med = 264.5)).

| Proxy                       | Group   | Measure    | Long sample length                                           | Short sample length                                          | Mild or Latent Severity ( <i>n</i> = 14)                     | Moderate or Severe Severity ( <i>n</i> = 9)                  | Latent Aphasia ( <i>n</i> = 6)                               | Clinical Aphasia ( <i>n</i> = 17)                            |
|-----------------------------|---------|------------|--------------------------------------------------------------|--------------------------------------------------------------|--------------------------------------------------------------|--------------------------------------------------------------|--------------------------------------------------------------|--------------------------------------------------------------|
|                             |         |            | ICC (95% CI)<br>[Spearman's rho]<br>Wilcoxon <i>p</i> -value |
| Lexical and informativeness | NBD     | %CIU       | 0.68 (0.22, 0.90)<br>[0.63], <i>p</i> = .23                  | 0.59 (0.09, 0.86)<br>[0.50], <i>p</i> = .13                  | N/A                                                          | N/A                                                          | N/A                                                          | N/A                                                          |
|                             | Aphasia |            | 0.04 (-0.42, 0.56)<br>[0.19], <i>p</i> = .08                 | 0.93 (0.63, 0.98)<br>[0.89], <i>p</i> = .009                 | 0.45 (-0.03, 0.77)<br>[0.59], <i>p</i> = .04                 | 0.83 (0.31, 0.96)<br>[0.88], <i>p</i> = .02                  | 0.28 (-0.50, 0.85)<br>[0.20], <i>p</i> = .31                 | 0.87 (0.58, 0.96)<br>[0.76], <i>p</i> = .007                 |
|                             | NBD     | PI Density | -0.09 (-0.70, 0.51)<br>[-0.04], <i>p</i> = .81               | 0.37 (-0.27, 0.77)<br>[0.35], <i>p</i> = .68                 | N/A                                                          | N/A                                                          | N/A                                                          | N/A                                                          |
|                             | Aphasia |            | 0.71 (0.24, 0.91)<br>[0.83], <i>p</i> = .11                  | 0.76 (0.38, 0.92)<br>[0.89], <i>p</i> = .52                  | 0.53 (-0.002, 0.82)<br>[0.58], <i>p</i> = .80                | 0.77 (0.27, 0.94)<br>[0.89], <i>p</i> = .13                  | 0.22 (-0.91, 0.85)<br>[0.37], <i>p</i> = .69                 | 0.79 (0.52, 0.92)<br>[0.89], <i>p</i> = .46                  |
|                             | NBD     | TTR        | 0.60 (0.12, 0.86)<br>[0.47], <i>p</i> = .15                  | 0.64 (0.16, 0.88)<br>[0.62], <i>p</i> = .06                  | N/A                                                          | N/A                                                          | N/A                                                          | N/A                                                          |
|                             | Aphasia |            | 0.62 (0.02, 0.88)<br>[0.75], <i>p</i> = .02                  | 0.81 (0.47, 0.94)<br>[0.66], <i>p</i> = .12                  | 0.68 (0.20, 0.89)<br>[0.70], <i>p</i> = .04                  | 0.94 (0.76, 0.99)<br>[0.93], <i>p</i> = .18                  | 0.64 (-0.10, 0.94)<br>[0.83], <i>p</i> = .06                 | 0.91 (0.76, 0.97)<br>[0.92], <i>p</i> = .07                  |
|                             | NBD     | Tokens     | 0.65 (0.18, 0.88)<br>[0.45], <i>p</i> = .27                  | 0.58 (0.002, 0.86)<br>[0.81], <i>p</i> = .01                 | N/A                                                          | N/A                                                          | N/A                                                          | N/A                                                          |
|                             | Aphasia |            | 0.67 (-0.05, 0.91)<br>[0.59], <i>p</i> = .004                | 0.78 (0.42, 0.93)<br>[0.86], <i>p</i> = .21                  | 0.77 (0.27, 0.93)<br>[0.71], <i>p</i> = .01                  | 0.96 (0.77, 0.99)<br>[0.996], <i>p</i> = .04                 | 0.63 (-0.11, 0.94)<br>[0.82], <i>p</i> = .04                 | 0.92 (0.75, 0.97)<br>[0.97], <i>p</i> = .02                  |

| Proxy                | Group   | Measure      | Long sample length<br>ICC (95% CI)<br>[Spearman's rho]<br>Wilcoxon <i>p</i> -value | Short sample length<br>ICC (95% CI)<br>[Spearman's rho]<br>Wilcoxon <i>p</i> -value | Mild or Latent Severity ( <i>n</i> = 14)<br>ICC (95% CI)<br>[Spearman's rho]<br>Wilcoxon <i>p</i> -value | Moderate or Severe Severity ( <i>n</i> = 9)<br>ICC (95% CI)<br>[Spearman's rho]<br>Wilcoxon <i>p</i> -value | Latent Aphasia ( <i>n</i> = 6)<br>ICC (95% CI)<br>[Spearman's rho]<br>Wilcoxon <i>p</i> -value | Clinical Aphasia ( <i>n</i> = 17)<br>ICC (95% CI)<br>[Spearman's rho]<br>Wilcoxon <i>p</i> -value |
|----------------------|---------|--------------|------------------------------------------------------------------------------------|-------------------------------------------------------------------------------------|----------------------------------------------------------------------------------------------------------|-------------------------------------------------------------------------------------------------------------|------------------------------------------------------------------------------------------------|---------------------------------------------------------------------------------------------------|
| Fluency / efficiency | NBD     |              | 0.78 (0.39, 0.93)<br>[0.84], <i>p</i> = .91                                        | 0.41 (-0.17, 0.79)<br>[0.36], <i>p</i> = .62                                        | N/A                                                                                                      | N/A                                                                                                         | N/A                                                                                            | N/A                                                                                               |
|                      | Aphasia | CIUs/min     | 0.64 (0.07, 0.89)<br>[0.49], <i>p</i> = .28                                        | 0.31 (-0.28, 0.74)<br>[0.70], <i>p</i> = .38                                        | 0.92 (0.77, 0.97)<br>[0.87], <i>p</i> = .17                                                              | 0.55 (-0.11, 0.88)<br>[0.63], <i>p</i> = .57                                                                | 0.83 (0.15, 0.98)<br>[0.94], <i>p</i> = .84                                                    | 0.59 (0.17, 0.83)<br>[0.64], <i>p</i> = .22                                                       |
|                      | NBD     |              | 0.65 (0.19, 0.89)<br>[0.47], <i>p</i> = .23                                        | 0.49 (-0.05, 0.82)<br>[0.76], <i>p</i> = .02                                        | N/A                                                                                                      | N/A                                                                                                         | N/A                                                                                            | N/A                                                                                               |
|                      | Aphasia | SpeakingSecs | 0.71 (0.19, 0.92)<br>[0.85], <i>p</i> = .02                                        | 0.86 (0.58, 0.96)<br>[0.74], <i>p</i> = .79                                         | 0.72 (0.30, 0.90)<br>[0.74], <i>p</i> = .06                                                              | 0.94 (0.75, 0.99)<br>[0.87], <i>p</i> = .95                                                                 | 0.74 (-0.05, 0.96)<br>[0.89], <i>p</i> = .06                                                   | 0.85 (0.63, 0.94)<br>[0.89], <i>p</i> = .54                                                       |
|                      | NBD     |              | 0.76 (0.36, 0.93)<br>[0.65], <i>p</i> = .57                                        | 0.42 (-0.19, 0.79)<br>[0.44], <i>p</i> = .91                                        | N/A                                                                                                      | N/A                                                                                                         | N/A                                                                                            | N/A                                                                                               |
|                      | Aphasia | WPM          | 0.88 (0.59, 0.97)<br>[0.73], <i>p</i> = .10                                        | 0.91 (0.66, 0.98)<br>[0.92], <i>p</i> = .02                                         | 0.91 (0.75, 0.97)<br>[0.90], <i>p</i> = .15                                                              | 0.96 (0.68, 0.99)<br>[0.93], <i>p</i> = .03                                                                 | 0.57 (-0.18, 0.92)<br>[0.37], <i>p</i> = .56                                                   | 0.96 (0.85, 0.99)<br>[0.95], <i>p</i> = .008                                                      |
| Syntactic            | NBD     |              | 0.64 (0.12, 0.88)<br>[0.41], <i>p</i> = .57                                        | 0.38 (-0.24, 0.77)<br>[0.56], <i>p</i> = .30                                        | N/A                                                                                                      | N/A                                                                                                         | N/A                                                                                            | N/A                                                                                               |
|                      | Aphasia | Noun/verb    | 0.83 (0.43, 0.95)<br>[0.81], <i>p</i> = .05                                        | 0.66 (0.15, 0.90)<br>[0.65], <i>p</i> = .02                                         | 0.91 (0.74, 0.97)<br>[0.65], <i>p</i> = .76                                                              | 0.60 (-0.02, 0.90)<br>[0.74], <i>p</i> = .31                                                                | 0.38 (-0.30, 0.87)<br>[0.54], <i>p</i> = .16                                                   | 0.71 (0.35, 0.89)<br>[0.74], <i>p</i> = .14                                                       |
|                      | NBD     |              | -0.06 (-0.57, 0.50)<br>[0.12], <i>p</i> = .31                                      | 0.51 (-0.10, 0.83)<br>[0.51], <i>p</i> > .99                                        | N/A                                                                                                      | N/A                                                                                                         | N/A                                                                                            | N/A                                                                                               |
|                      | Aphasia | Open/closed  | 0.74 (0.32, 0.92)<br>[0.74], <i>p</i> = .28                                        | 0.57 (-0.05, 0.86)<br>[0.47], <i>p</i> = .76                                        | 0.66 (0.23, 0.88)<br>[0.73], <i>p</i> = .81                                                              | 0.60 (-0.19, 0.91)<br>[0.26], <i>p</i> > .99                                                                | 0.87 (0.35, 0.98)<br>[0.83], <i>p</i> = .69                                                    | 0.58 (0.12, 0.83)<br>[0.40], <i>p</i> = .90                                                       |

| Proxy | Group   | Measure | Long sample length                                      | Short sample length                                     | Mild or Latent Severity ( $n = 14$ )                    | Moderate or Severe Severity ( $n = 9$ )                 | Latent Aphasia ( $n = 6$ )                              | Clinical Aphasia ( $n = 17$ )                           |
|-------|---------|---------|---------------------------------------------------------|---------------------------------------------------------|---------------------------------------------------------|---------------------------------------------------------|---------------------------------------------------------|---------------------------------------------------------|
|       |         |         | ICC (95% CI)<br>[Spearman's rho]<br>Wilcoxon $p$ -value |
|       | NBD     | MLU     | 0.65 (0.13, 0.89)<br>[0.57], $p = .85$                  | 0.50 (-0.10, 0.83)<br>[0.55], $p = .97$                 | N/A                                                     | N/A                                                     | N/A                                                     | N/A                                                     |
|       | Aphasia |         | 0.59 (0.07, 0.87)<br>[0.66], $p = .15$                  | 0.94 (0.79, 0.98)<br>[0.91], $p = .73$                  | 0.78 (0.44, 0.92)<br>[0.61], $p = .72$                  | 0.94 (0.77, 0.99)<br>[0.88], $p = .30$                  | 0.01 (-0.52, 0.71)<br>[-0.20], $p = .22$                | 0.95 (0.88, 0.98)<br>[0.86], $p = .89$                  |
|       | NBD     | VerbUtt | 0.59 (0.03, 0.86)<br>[0.51], $p = .97$                  | 0.48 (-0.10, 0.82)<br>[0.49], $p = .23$                 | N/A                                                     | N/A                                                     | N/A                                                     | N/A                                                     |
|       | Aphasia |         | 0.32 (-0.21, 0.74)<br>[0.33], $p = .15$                 | 0.90 (0.70, 0.97)<br>[0.87], $p = .38$                  | 0.70 (0.28, 0.89)<br>[0.45], $p = .81$                  | 0.93 (0.72, 0.98)<br>[0.87], $p = .82$                  | 0.07 (-0.27, 0.68)<br>[-0.03], $p = .09$                | 0.91 (0.78, 0.97)<br>[0.82], $p = .40$                  |

Koo and Li (2016) gives the following suggestion for interpreting intraclass correlation coefficient (ICC), including confidence intervals: below 0.50 = poor; between 0.50 and 0.75 = moderate; between 0.75 and 0.90 = good; and above 0.90 = excellent.
