# Supplementary material
Source: publisher figshare collection journal article supplement (https://asha.figshare.com/articles/dataset/_/23298032)
Supplement: Supplementary file 13 [file 1]

**Supplemental Table S8.** Summary of test-retest results for the Refused Umbrella task (describing a picture sequence).

Koo and Li (2016) gives the following suggestion for interpreting ICC: below 0.50 = poor; between 0.50 and 0.75 = moderate; between 0.75 and 0.90 = good; and above 0.90 = excellent. Lin's concordance correlation coefficient (CCC) is given in cases where ICC is poor, to identify if this improves the estimate. If it does improve the estimate, it suggests that test-retest the low ICC is due to lack of spread (i.e., lack of true intra-group variability).

| Primary Proxy               | Measure      | Group   | ICC (CCC)      | 95% ICC CI (95% CCC CI)      | Koo & Li (2016) ICC Quality (CI Quality) | Spearman's rho ( $p$ -value)      | Systematic difference  | SEM / MDC90   |
|-----------------------------|--------------|---------|----------------|------------------------------|------------------------------------------|-----------------------------------|------------------------|---------------|
| Lexical and informativeness | %CIU         | NBD     | 0.79           | 0.57, 0.90                   | Good (Moderate – Exc.)                   | 0.08 ( $p = .72$ )                | $V = 125, p = .49$     | 0.06          |
|                             |              | Aphasia | 0.82           | 0.62, 0.92                   | Good (Moderate – Exc.)                   | 0.67 ( $p = .001$ ) <sup>^</sup>  | $V = 109, p = .39$     | 0.10 / 0.23   |
|                             | PI Density   | NBD     | 0.35<br>(0.34) | -0.05, 0.65<br>(-0.05, 0.64) | Poor (Poor – Moderate)                   | 0.27 ( $p = .20$ )                | $V = 111, p = .27$     | 0.04          |
|                             |              | Aphasia | 0.90           | 0.77, 0.95                   | Excellent (Good – Exc.)                  | 0.73 ( $p < .0001$ ) <sup>^</sup> | $V = 105, p = .33$     | 0.04 / 0.10   |
|                             | TTR          | NBD     | 0.72           | 0.45, 0.87                   | Moderate (Poor – Good)                   | 0.74 ( $p < .0001$ ) <sup>^</sup> | $V = 151, p = .70$     | 0.05          |
|                             |              | Aphasia | 0.72           | 0.45, 0.87                   | Moderate (Poor – Good)                   | 0.63 ( $p = .001$ ) <sup>^</sup>  | $V = 105, p = .32$     | 0.06 / 0.15   |
|                             | Tokens       | NBD     | 0.78           | 0.50, 0.91                   | Good (Moderate – Exc.)                   | 0.84 ( $p < .0001$ ) <sup>^</sup> | $V = 56.5, p = .008^*$ | 26.81         |
|                             |              | Aphasia | 0.69           | 0.38, 0.86                   | Moderate (Poor – Good)                   | 0.87 ( $p < .0001$ ) <sup>^</sup> | $V = 58.5, p = .02^*$  | 37.24 / 86.91 |
|                             | CIUs / min   | NBD     | 0.74           | 0.49, 0.88                   | Moderate (Poor – Good)                   | 0.57 ( $p = .004$ ) <sup>^</sup>  | $V = 173, p = .53$     | 18.95         |
|                             |              | Aphasia | 0.90           | 0.79, 0.96                   | Excellent (Good – Exc.)                  | 0.89 ( $p < .0001$ ) <sup>^</sup> | $V = 82, p = .09$      | 12.52 / 29.21 |
| Fluency / efficiency        | SpeakingSecs | NBD     | 0.76           | 0.42, 0.90                   | Good (Poor – Exc.)                       | 0.82 ( $p < .0001$ ) <sup>^</sup> | $V = 46.5, p = .006^*$ | 10.92         |
|                             |              | Aphasia | 0.56           | 0.21, 0.78                   | Moderate (Poor – Good)                   | 0.79 ( $p < .0001$ ) <sup>^</sup> | $V = 90, p = .39$      | 29.39 / 68.57 |
|                             | WPM          | NBD     | 0.65           | 0.35, 0.83                   | Moderate (Poor – Good)                   | 0.58 ( $p = .003$ ) <sup>^</sup>  | $V = 183, p = .36$     | 21.15         |
|                             |              | Aphasia | 0.89           | 0.76, 0.95                   | Good (Good – Exc.)                       | 0.84 ( $p < .0001$ ) <sup>^</sup> | $V = 83, p = .10$      | 13.68 / 31.91 |
| Syntactic                   | MLU          | NBD     | 0.46           | 0.08, 0.72                   | Poor (Poor – Moderate)                   | 0.56 ( $p = .005$ ) <sup>^</sup>  | $V = 67.5, p = .02^*$  | 1.26          |
|                             |              | Aphasia | 0.81           | 0.62, 0.92                   | Good (Moderate – Exc.)                   | 0.65 ( $p = .001$ ) <sup>^</sup>  | $V = 104, p = .32$     | 1.11 / 2.58   |
|                             | Noun/verb    | NBD     | 0.25           | -0.14, 0.58                  | Poor (Poor – Moderate)                   | 0.18 ( $p = .41$ )                | $V = 107, p = .23$     | 0.13          |

| Primary Proxy | Measure     | Group   | ICC (CCC) | 95% ICC CI (95% CCC CI) | Koo & Li (2016) ICC Quality (CI Quality) | Spearman's rho ( <i>p</i> -value) | Systematic difference    | SEM / MDC90 |
|---------------|-------------|---------|-----------|-------------------------|------------------------------------------|-----------------------------------|--------------------------|-------------|
|               |             |         | (0.24)    | (-0.14, 0.56)           | CCC remains poor                         |                                   |                          |             |
|               |             | Aphasia | 0.07      | -0.37, 0.49             | Poor (Poor)                              | 0.04 ( <i>p</i> = .87)            | V = 113, <i>p</i> = .95  | 0.67 /1.57  |
|               |             |         | (0.07)    | (-0.30, 0.42)           | CCC remains poor                         |                                   |                          |             |
|               | Open/closed | NBD     | 0.08      | -0.35, 0.47             | Poor (Poor)                              | 0.36 ( <i>p</i> = .08)            | V = 169, <i>p</i> = .60  | 0.22        |
|               |             |         | (0.07)    | (-0.30, 0.43)           | CCC remains poor                         |                                   |                          |             |
|               |             | Aphasia | 0.18      | -0.24, 0.55             | Poor (Poor – Moderate)                   | 0.45 ( <i>p</i> = .04)*           | V = 128, <i>p</i> = .97  | 0.51 / 1.20 |
|               |             |         | (0.17)    | (-0.14, 0.45)           | CCC remains poor                         |                                   |                          |             |
|               | VerbUtt     | NBD     | 0.29      | -0.10, 0.61             | Poor (Poor – Moderate)                   | 0.32 ( <i>p</i> = .13)            | V = 91, <i>p</i> = .16   | 0.25        |
|               |             |         | (0.28)    | (-0.09, 0.59)           | CCC remains poor                         |                                   |                          |             |
|               |             | Aphasia | 0.75      | 0.51, 0.89              | Good (Moderate – Good)                   | 0.65 ( <i>p</i> = .001)*^         | V = 98.5, <i>p</i> = .37 | 0.33 / 0.77 |

CI = confidence interval; %CIU = Percentage of correct information units; CIUs/min = correct information units per minute; MLU = mean length of utterance (in words); VerbUtt = verbs per utterance; Noun/verb = noun-to-verb ratio; Open/closed = open-to-closed class word ratio; SpeakingSecs = speaking duration in seconds; PI Density = propositional idea density; TTR = type-token ratio; WPM = words per minute.

\* = significant; ^ = significant after Bonferroni correction (11 row-wise within group corrections; new *p* < .0045).
